# Supplementary material for: Rh D blood group conversion using transcription activator-like effector nucleases
Source: PubMed Central journal article supplement (PMC4490371; doi:10.1038/ncomms8451), 2015-06-16
Supplement: ncomms8451-s1.pdf [file ncomms8451-s1.pdf]

## Supplementary information

### Rh D blood group conversion using transcription activator-like effector nucleases

Young-Hoon Kim<sup>1,2</sup>, Hyun Ok Kim<sup>3</sup>, Eun Jung Baek<sup>4</sup>, Ryo Kurita<sup>5</sup>, Hyuk-Jin Cha<sup>6</sup>, Yukio Nakamura<sup>7</sup>, Hyongbum Kim<sup>1,2</sup>

<sup>1</sup>Graduate School of Biomedical Science and Engineering/college of Medicine, Hanyang University, Seoul, 133-791, South Korea, <sup>2</sup>Department of Pharmacology, Brain Korea 21 Plus Project for Medical Sciences, Yonsei University College of Medicine, Seoul, 120-752, South Korea, <sup>3</sup>Department of Laboratory Medicine, Yonsei University College of Medicine, Seoul, 120-752, South Korea, <sup>4</sup>Department of Laboratory Medicine, Hanyang University College of Medicine, Seoul, 133-791, South Korea, <sup>5</sup>Department of Research and Development, Central Blood Institute, Japanese Red Cross Society, Tokyo, 135-8521, Japan, <sup>6</sup>Department of Life Sciences, College of Natural Sciences, Sogang University, Seoul, 121-742, Korea, <sup>7</sup>Cell Engineering Division, RIKEN BioResource Center, Tsukuba, Ibaraki, 305-0074, Japan.

Supplementary information:

Supplementary Figures 1 – 15

Supplementary Table 1

Supplementary Note 1

Supplementary Reference

**Supplementary Figure 1. The reported transcript variants of the *RHD* gene**

The transcript variants of *RHD* reported in NCBI and Ensembl are shown with their accession numbers and transcript IDs, respectively, on the right. All of the variants have the start codon in exon 1 except variant 3, which has the start codon in exon 4. Blue circles and black boxes indicate exons and coding sequence (CDS), respectively.

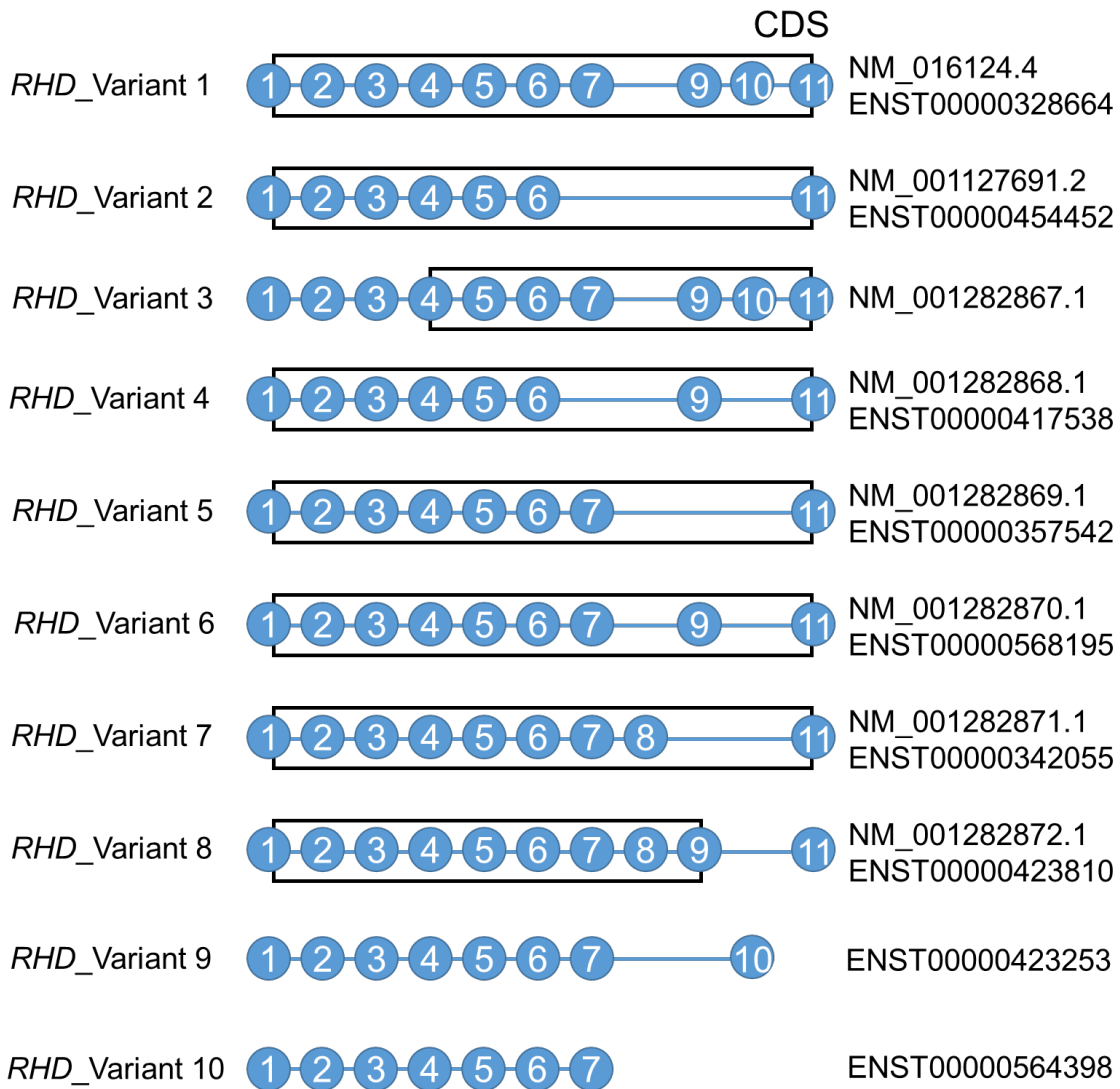

## Supplementary Figure 2. The structure and working mechanism of the episomal reporters

mRFP is constitutively expressed by the CMV promoter ( $P_{CMV}$ ), whereas eGFP and H-2K<sup>k</sup> are not expressed without the activity of TALENs because i) the sequences are out of frame and ii) there is a stop codon before the eGFP gene. When a double-strand break is introduced into the target sequence by TALENs, the break is repaired by nonhomologous end-joining (NHEJ) which often results in indels. Indel generation can cause frame shifts, which can render eGFP and H-2K<sup>k</sup> genes in frame and lead to the expression of eGFP and H-2K<sup>k</sup>.

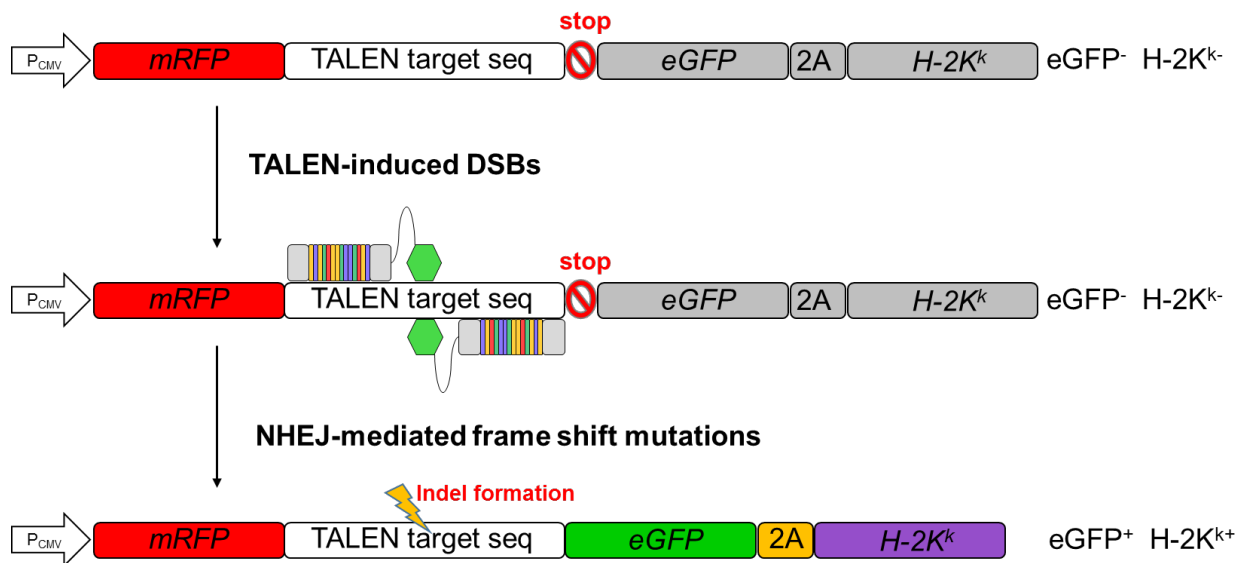

### Supplementary Figure 3. T7E1 assay to screen mutant clones

Clonal culture of HiDEP-1 erythroid progenitor cells was initiated three days after transfection with plasmids encoding TALENs that target *RHD*. Genomic DNA from each clone was analyzed 17 days after the initiation of clonal culture. Genomic DNA from four clones was mixed at a 1:1:1:1 weight ratio and subjected to the T7E1 assay to determine whether at least one of the four clones contains mutations. The identities of the clones in each DNA mixture are shown. Arrows indicate the expected position of DNA bands cleaved by T7E1. Genomic DNA mixtures containing mutations at the target sites are marked with red clone numbers. Untransfected cells and a cell population transfected with the TALENs were used as the negative control (NC) and positive control (PC), respectively. The sizes of marker (M) bands are shown on the left (Kbp, kilobase pairs).

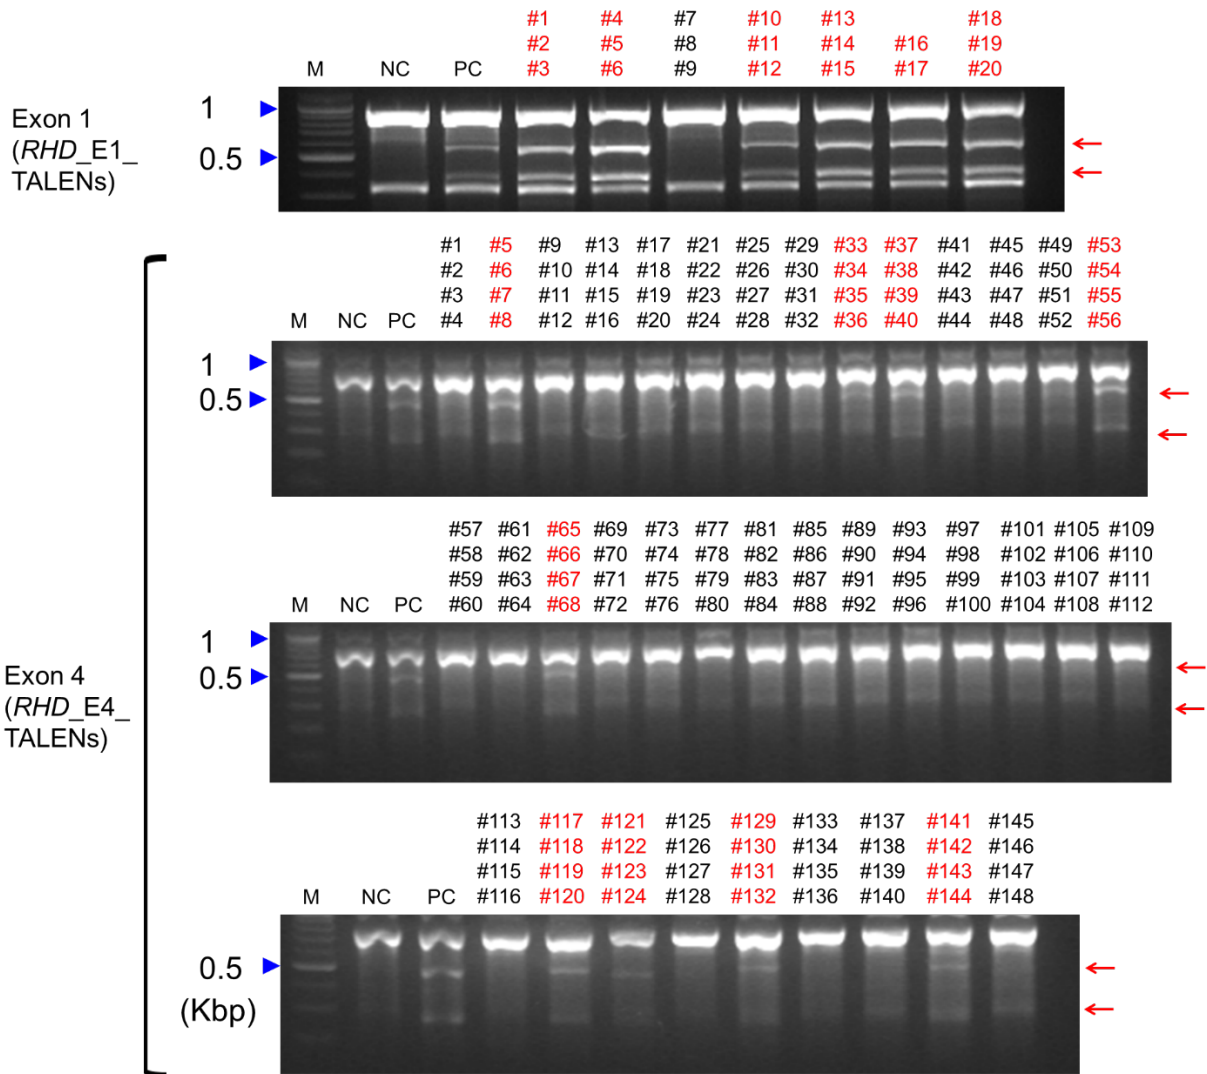



## Supplementary Figure 4. DNA sequences of *RHD*-mutated clones

HiDEP-1 cells were co-transfected with the reporter plasmid and plasmids encoding TALENs that target *RHD* exon 1 (a, b) or exon 4 (c). After magnetic separation, cells were subjected to clonal culture. Genomic DNA was isolated from each clone, PCR-amplified, and cloned into T vectors; individual cloned amplicons were then subjected to sequencing. The *RHD* gene DNA sequences in the wild-type cells and selected clones (#number) are shown with TALE binding sequences in a red font. Clone #7 (a) was subjected to another cycle of transfection, magnetic separation, and clonal culture; subclones derived from clone #7 are indicated by a number following #7 (b). Deleted bases are indicated by dashes and inserted bases are shown in a blue font. The number of occurrences is shown in parentheses (e.g., x2 and x4 indicate the number of each sequence). Clones that were selected for further experiments are indicated with the clone name in a red color.

### a Exon 1

GGGCCCTAACACTGGAAGCAGCTCTCATTCTCCTCTTCTATTTTTTTTACCCACTATGACGCTTC (Wild type)

#1 GGGCCCTAACACTGGAAGCAGCTCTCATTCTCCTCTTCTATTTTTTTTACCCACTATGACGCTTC (x2) ← Wild type  
GGGCCCTAACACTGGAAGCAGCTCTCAT--TCCTCTTCTATTTTTTTTACCCACTATGACGCTTC (x3) ← 2nt deletion; out of frame

#3 GGGCCCTAACACTGGAAGCAGCTCTCATTCTCCTCTTCTATTTTTTTTACCCACTATGACGCTTC (x3) ← Wild type  
GGGCCCTAACACTGGAAGCAGCTCTCATTCT--TCTTCTATTTTTTTTACCCACTATGACGCTTC (x2) ← 2nt deletion; out of frame

#4 GGGCCCTAACACTGGAAGCAGCTCTCATTCTCC-----ATTTTTTTTACCCACTATGACGCTTC (x3) ← 6nt deletion; inframe  
GGGCCCTAACACTGGAAGCAGCTCTCATTCTC--CTTCTATTTTTTTTACCCACTATGACGCTTC (x2) ← 2nt deletion; out of frame

#6 GGGCCCTAACACTGGAAGCAGCTCTCATTCTCCTCTTCTATTTTTTTTACCCACTATGACGCTTC (x1) ← Wild type  
GGGCCCTAACACTGGAAGCAGCTCTCAT-----TCTTCTATTTTTTTTACCCACTATGACGCTTC (x11) ← 5nt deletion; out of frame

#11 GGGCCCTAACACTGGAAGCAGCTCTCATTCTCCTCTTCTATTTTTTTTACCCACTATGACGCTTC (x2) ← Wild type  
GGGCCCTAACACTGGAAGCAGCTCTCAT-----TCTTCTATTTTTTTTACCCACTATGACGCTTC (x3) ← 5nt deletion; out of frame

#15 GGGCCCTAACACTGGAAGCAGCTCTCATTCTCCTCTTCTATTTTTTTTACCCACTATGACGCTTC (x3) ← Wild type  
GGGCCCTAACACTGGAAGCAGCTCTCATTCTCC---TCTATTTTTTTTACCCACTATGACGCTTC (x2) ← 3nt deletion; inframe

#17 GGGCCCTAACACTGGAAGCAGCTCTCATTCTCCTCTTCTATTTTTTTTACCCACTATGACGCTTC (x1) ← Wild type  
GGGCCCTAACACTGGAAGCAGCTCTCATTCTC--CTTCTATTTTTTTTACCCACTATGACGCTTC (x4) ← 2nt deletion; out of frame

#19 GGGCCCTAACACTGGAAGCAGCTCTCATTCTCCTCTTCTATTTTTTTTACCCACTATGACGCTTC (x2) ← Wild type  
GGGCCCTAACACTGGAAGCAGCTCTCATTCTCCTC--CTATTTTTTTTACCCACTATGACGCTTC (x2) ← 2nt deletion; out of frame

#20 GGGCCCTAACACTGGAAGCAGCTCTCATTCTCCTCTTCTATTTTTTTTACCCACTATGACGCTTC (x3) ← Wild type  
GGGCCCTAACACTGGAAGCAGCTCTCA-----TTCTATTTTTTTTACCCACTATGACGCTTC (x1) ← 8nt deletion; out of frame

## b Exon 1

GGGCCCTAACACTGGAAGCAGCTCTCATTCTCCTCTTCTATTTTTTTTACCCACTATGACGCTTC (Wild type)

- #17-1 GGGCCCTAACACTGGAAGCAGCTCTCATTCTCCTCTTCTATTTTTTTTACCCACTATGACGCTTC (x2) ← Wild type  
GGGCCCTAACACTGGAAGCAGCTCTCATTCTC--CTTCTATTTTTTTTACCCACTATGACGCTTC (x4) ← 2nt deletion; out of frame
- #17-2 GGGCCCTAACACTGGAAGCAGCTCTCATTCTCCTCTTCTATTTTTTTTACCCACTATGACGCTTC (x2) ← Wild type  
GGGCCCTAACACTGGAAGCAGCTCTCATTCTC--CTTCTATTTTTTTTACCCACTATGACGCTTC (x3) ← 2nt deletion; out of frame
- #17-3 (E1\_B) GGGCCCTAACACTGGAAGCAGCTCTCATTCTCCT--TTCTATTTTTTTTACCCACTATGACGCTTC (x7) ← 1nt deletion; out of frame  
GGGCCCTAACACTGGAAGCAGCTCTCATTCTC--CTTCTATTTTTTTTACCCACTATGACGCTTC (x5) ← 2nt deletion; out of frame
- #17-4 GGGCCCTAACACTGGAAGCAGCTCTCATTCTCCTCTTCTATTTTTTTTACCCACTATGACGCTTC (x1) ← Wild type  
GGGCCCTAACACTGGAAGCAGCTCTCATTCTC--CTTCTATTTTTTTTACCCACTATGACGCTTC (x4) ← 2nt deletion; out of frame
- #17-5 GGGCCCTAACACTGGAAGCAGCTCTCATTCTCCTCTTCTATTTTTTTTACCCACTATGACGCTTC (x2) ← Wild type  
GGGCCCTAACACTGGAAGCAGCTCTCATTCTC--CTTCTATTTTTTTTACCCACTATGACGCTTC (x4) ← 2nt deletion; out of frame
- #17-6 GGGCCCTAACACTGGAAGCAGCTCTCATTCTCCTCTTCTATTTTTTTTACCCACTATGACGCTTC (x3) ← Wild type  
GGGCCCTAACACTGGAAGCAGCTCTCATTCTC--CTTCTATTTTTTTTACCCACTATGACGCTTC (x3) ← 2nt deletion; out of frame
- #17-7 GGGCCCTAACACTGGAAGCAGCTCTCATTCTCCTCTTCTATTTTTTTTACCCACTATGACGCTTC (x2) ← Wild type  
GGGCCCTAACACTGGAAGCAGCTCTCATTCTC--CTTCTATTTTTTTTACCCACTATGACGCTTC (x4) ← 2nt deletion; out of frame

## c Exon 4

TTGGGCTGTCTGTGGCCTGGTGCCTGCCAAAGCCTCTACCCGAGGGAACGGAGGATAAAGATCA (Wild type)

- #5 (E4\_B) TTTCCTCCACTCCACACACCCCTAAGACTCTGGATCCTGCGAGGGAACGGAGGATAAAGATCA (x2) ← 31nt deletion, 236nt insertion; out of frame  
TTGGGCTGTCTGTGGCCTGGTGCCTGCCAAAG-CTCTACCCGAGGGAACGGAGGATAAAGATCA (x17) ← 1nt deletion; out of frame
- #8 (E4\_M) TTGGGCTGTCTGTGGCCTGGTGCCTGCCAAAGCCTCTACCCGAGGGAACGGAGGATAAAGATCA (x1) ← Wild type  
TTGGGCTGTCTGTGGCCT-----CTACCCAAGGGAACGGAGGATAAAGATCA (x5) ← 24nt deletion, 7nt insertion; out of frame
- #33 TTGGGCTGTCTGTGGCCTGGTGCCTGCCAAAGCCTCTACCCGAGGGAACGGAGGATAAAGATCA (x2) ← Wild type  
TTGGGCTGTCTGTGGCCTGGT-----CGGAGGATAAAGATCA (x4) ← 27nt deletion; inframe
- #37 TTGGGCTGTCTGTGGCCTGGTGCCTGCCAAAGCCTCTACCCGAGGGAACGGAGGATAAAGATCA (x3) ← Wild type  
TTGGGCTGTCTGTGGCCTGGTGCCTGCCAAAG-----GAACGGAGGATAAAGATCA (x3) ← 12nt deletion; inframe
- #53 TTGGGCTGTCTGTGGCCTGGTGCCTGCCAAAGCCTCTACCCGAGGGAACGGAGGATAAAGATCA (x3) ← Wild type  
TTGGGCTGTCTGTGGCCTGGTGCCTGCCAA---CTCTACCCGAGGGAACGGAGGATAAAGATCA (x3) ← 3nt deletion; inframe
- #118 TTGGGCTGTCTGTGGCCTGGTGC-----TCTACCCGAGGGAACGGAGGATAAAGATCA (x9) ← 11nt deletion; out of frame  
TTGGGCTGTCTGTGGCCTGGTGCCTGCCAAAG-CTCTACCCGAGGGAACGGAGGATAAAGATCA (x4) ← 1nt deletion; out of frame
- #122 TTGGGCTGTCTGTGGCCTGGTGCCTGCCAAAGCCTCTACCCGAGGGAACGGAGGATAAAGATCA (x1) ← Wild type  
-----GAACGGAGGATAAAGATCA (x5) ← 54nt deletion; inframe

### Supplementary Figure 5. Two dimensional representation of the RHD protein structure

A two dimensional structure of the RHD protein translated from transcript variant 1 is shown. The positions of premature termination codons (PTCs) observed in E1\_B and E4\_B are indicated with arrows. The picture was re-drawn based on a previous presentation<sup>47</sup> (<http://www.uniulm.de/~wflegel/RH/SympDGTI2004/4WagnerDGTI2004MA>).

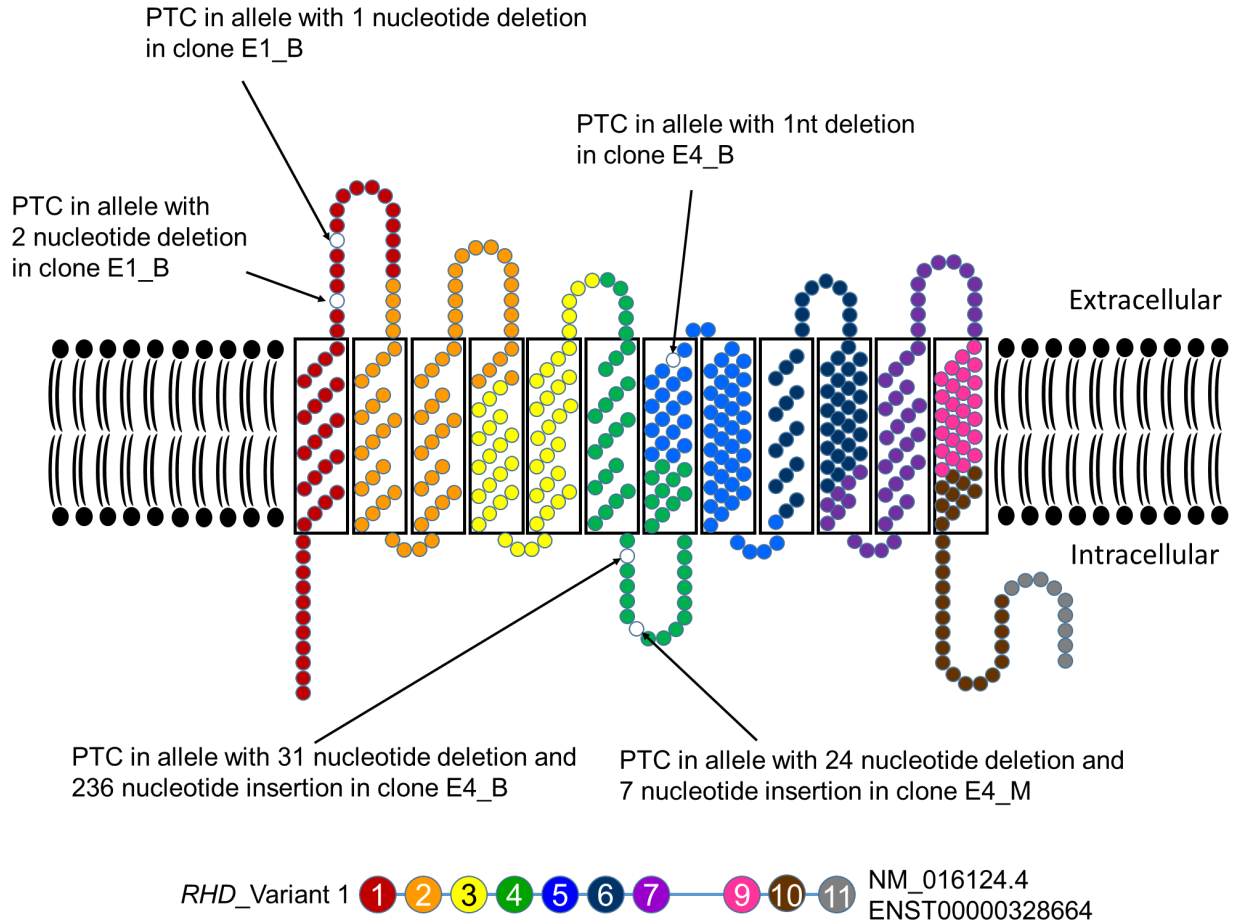



**b Off target (RHCE)**

**Clone E1\_B: sequences (10/10)**

```

GGGCCCTAACACTGGAAGCAGCTCTCATTCTCCTCTTCTATTTTTTTACCCACTATGACGCTTC (RHD Wild-type)
GCGCCCTAACACTGGAAGCAGCTCTCATTCTCCTCTTCTATTTTTTTACCCACTATGACGCTTC (RHCE Wild-type)
GCGCCCTAACACTGGAAGCAGCTCTCATTCTCC---TCTATTTTTTTACCCACTATGACGCTTC (x6)
GCGCCCTAACACTGGAAGCAGCTCTCATTCTC---TCTATTTTTTTACCCACTATGACGCTTC (x4)
    
```

← 3nt deletion  
← 3nt deletion

Allele with 3nt deletion

Allele with 3nt deletion

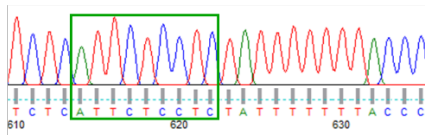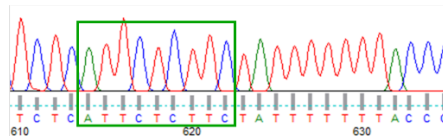

**C**

**RHD\_E4\_TALEN\_L**

```

TGTCTGTGGCCTGGTGCCTG
: : : : : : : : : : : :
    
```

**On-Target (RHD\_exon4)**

```

5' TGTCTGTGGCCTGGTGCCTGN12CCCAGGGAACGGAGGATAA3'
3' ACAGACACCGGACCACGGACN12GGGCTCCCTTGCCCTCCTATT5'
: : : : : : : : : : : :
GGGCTCCCTTGCCCTCCTATT
RHD_E4_TALEN_R
    
```

**RHD\_E4\_TALEN\_L**

```

TGTCTGTGGCCTGGTGCCTG
: : : : : : : : : : : :
    
```

**Off-Target (RHCE)**

```

5' TGACTTGTGGCCTGGTGCCTGN12CCAGAGGGAACGGAGGATAA3'
3' ACTGACACCGGACCACGGACN12GGTTCTCCCTTGCCCTCCTATT5'
: : : : : : : : : : : :
GGGCTCCCTTGCCCTCCTATT
RHD_E4_TALEN_R
    
```

**RHD\_E4\_TALEN\_L**

```

TGTCTGTGGCCTGGTGCCTG
: : : : : : : : : : : :
    
```

**Off-Target (PMEPA1)**

```

5' TCCCTGTGGCCTGGTGCCTGN24CAGGCCAAAAGCCACAAAGA3'
3' AGGGACACCGGACCACGGACN24GTCCGGTTTTCGGTGTTC5'
: : : : : : : : : : : :
GTCCGTGGTCCGGTGTCTGT
RHD_E4_TALEN_L
    
```

**RHD\_E4\_TALEN\_R**

```

TGTCTGTGGCCTGGTGCCTG
: : : : : : : : : : : :
    
```

**Off-Target (PPP3CA)**

```

5' TGTCTGTGGCCTGGGGTGN10CCCTAGAGAACCAAGTATAA3'
3' ACAGACACCGGACCCCAACN10GGGATCTCTTGGTTCATAT5'
: : : : : : : : : : : :
GGGCTCCCTTGCCCTCCTATT
RHD_E4_TALEN_L
    
```

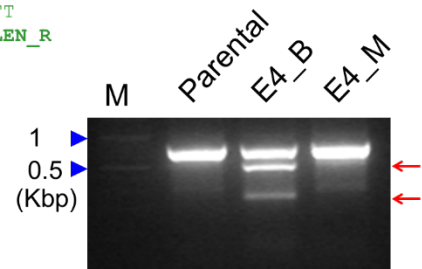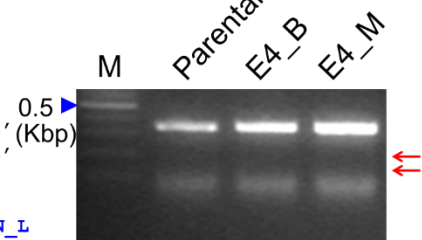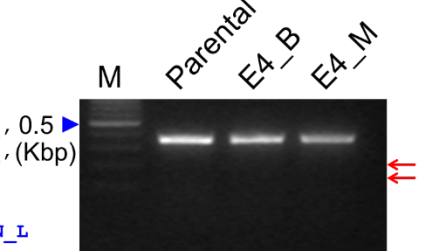

d Off target (RHCE)

Clone E4\_B: sequences (10/10)

```

TTGGGCTGTCTGTGGCCTGGTGCCTGCCAAAGCCTCTACCCGAGGGAACGGAGGATAAAGATCA (RHD Wild-type)
TTGGGCTGACTGTGGCCTGGTGCCTGCCAAAGCCTCTACCCAGGGAACGGAGGATAATGATCA (RHCE Wild-type)
TTGGGCTGACTGTGGCCTGGTGCCTGCCA-----GAACGGAGGATAATGATCA (x5)
TTGGGCTGACTGTGGCCTGGTGCCTGCCAAAGCCTCTACCCAGGGAACGGAGGATAATGATCA (x5)
    
```

← 16nt deletion

Allele with 3nt deletion

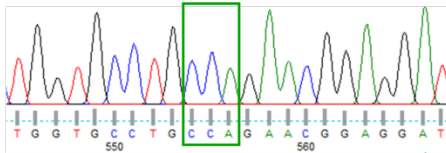

Allele with Wild type sequence

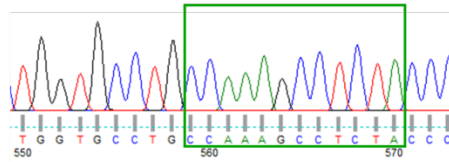

Clone E4\_M: sequences (10/10)

```

TTGGGCTGTCTGTGGCCTGGTGCCTGCCAAAGCCTCTACCCGAGGGAACGGAGGATAAAGATCA (RHD Wild-type)
TTGGGCTGACTGTGGCCTGGTGCCTGCCAAAGCCTCTACCCAGGGAACGGAGGATAATGATCA (RHCE Wild-type)
TTGGGCTGACTGTGGCCTGGTGCCTGCCAAAGCCTCTACCCAGGGAACGGAGGATAATGATCA (x10)
    
```

Allele with Wild type sequence

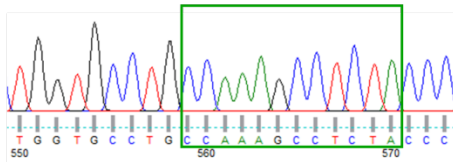

Allele with Wild type sequence

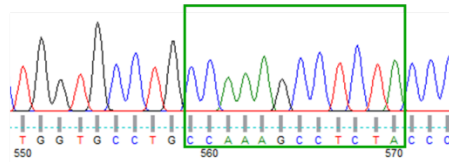

**Supplementary Figure 7. Schematic representation of *RHD* mRNA variants in erythroid cells derived from cord blood CD34<sup>+</sup> cells and HUDEP-2 cells.**

RT-PCR was performed to detect *RHD* mRNA in each cell type; the amplicons were then subjected to sequencing. The number of occurrences is shown on the right of each transcript. The blue circles indicate exons.

**Erythroid cells  
from cord blood CD34<sup>+</sup> cells**

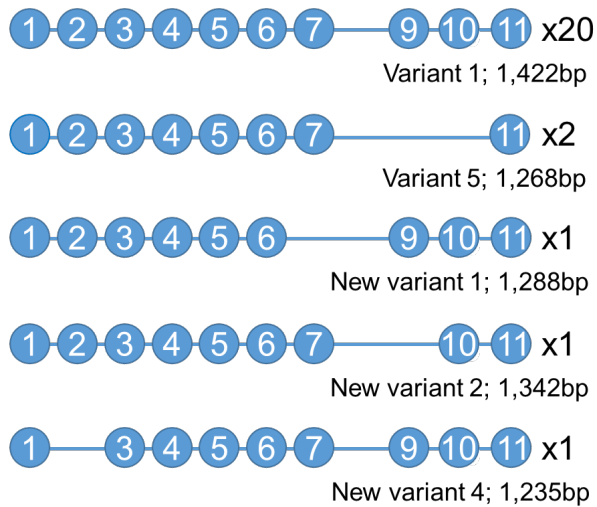

**HUDEP-2**

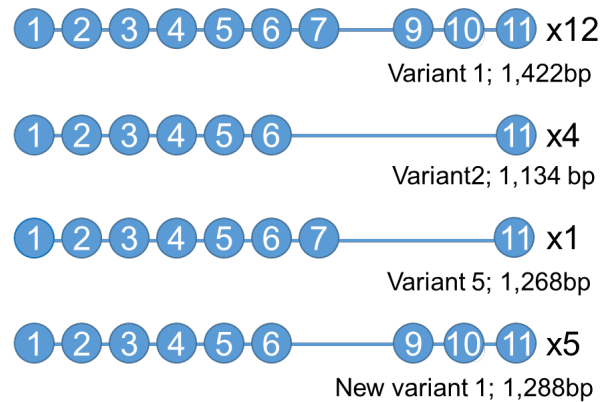

### Supplementary Figure 8. Flow cytometric analysis of D antigen expression in mutated cells

Parental and *RHD*-mutated (biallelic, E1\_B, E4\_B; monoallelic, E4\_M) HiDEP-1 cells were induced for differentiation for four days and subjected to flow cytometry. Dot plots show that D antigen is expressed in parental and monoallelic mutated cells, but not in biallelic mutated cells. Rh D-positive and D-negative peripheral blood cells were used as positive and negative controls, respectively.

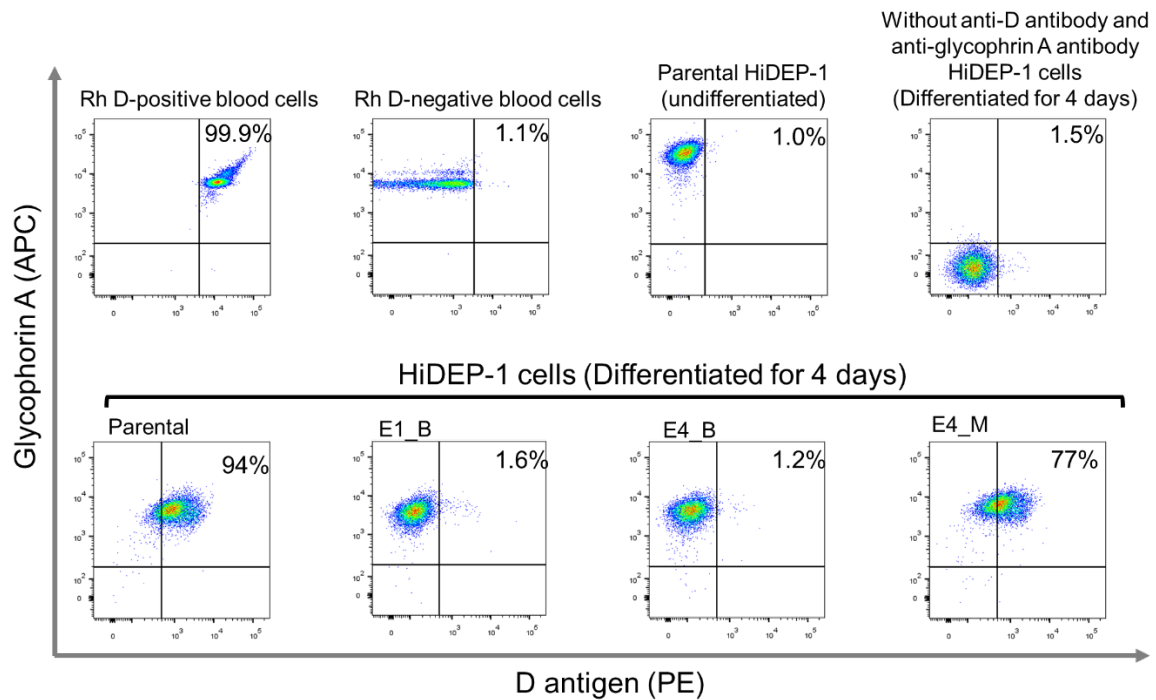



**Supplementary Figure 9. Absence of Rh D antigen-mediated agglutination in *RHD*-knockout cell lines**

Parental, *RHD*-knockout (E1\_B, E4\_B), and *RHD*-monoallelic mutant (E4\_M) HiDEP-1 cells were induced for differentiation for four days and subjected to an agglutination test using anti-D blood grouping reagents in 96 well plates. Rh D-positive and D-negative blood cells were used as positive and negative controls, respectively. Pictures of the agglutination test covering whole test wells are shown.

Rh D-positive  
blood cells

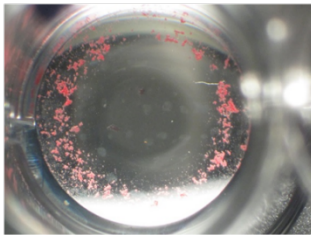

Rh D-negative  
blood cells

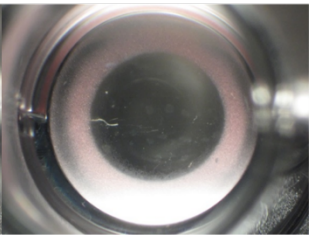

HiDEP-1 cells (Differentiated for 4 days)

Parental

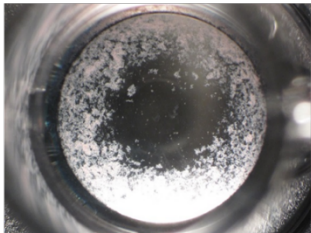

E1\_B

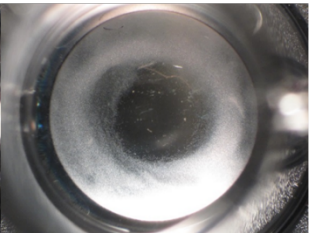

E4\_B

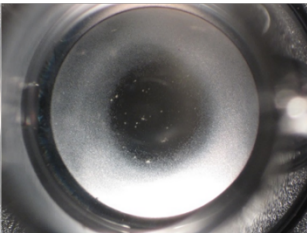

E4\_M

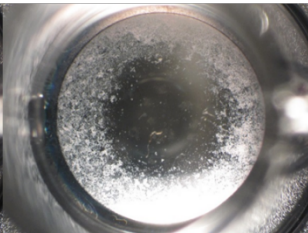

**Supplementary Figure 10. Expression of erythroblast specific markers in parental and mutant cells.**

Parental and *RHD*-mutated (biallelic, E1\_B, E4\_B; monoallelic, E4\_M) HiDEP-1 cells were induced for differentiation for four days and subjected to flow cytometry to evaluate glycophorin A and CD71 expression. (a) Representative flow cytometry. (b) The expression levels of glycophorin A and CD71. The percentage of glycophorin A<sup>+</sup>CD71<sup>+</sup> cells was the same in the parental and *RHD*-mutant clones (n = 4, ANOVA was performed). Error bars represent the standard error of the mean (S.E.M.).

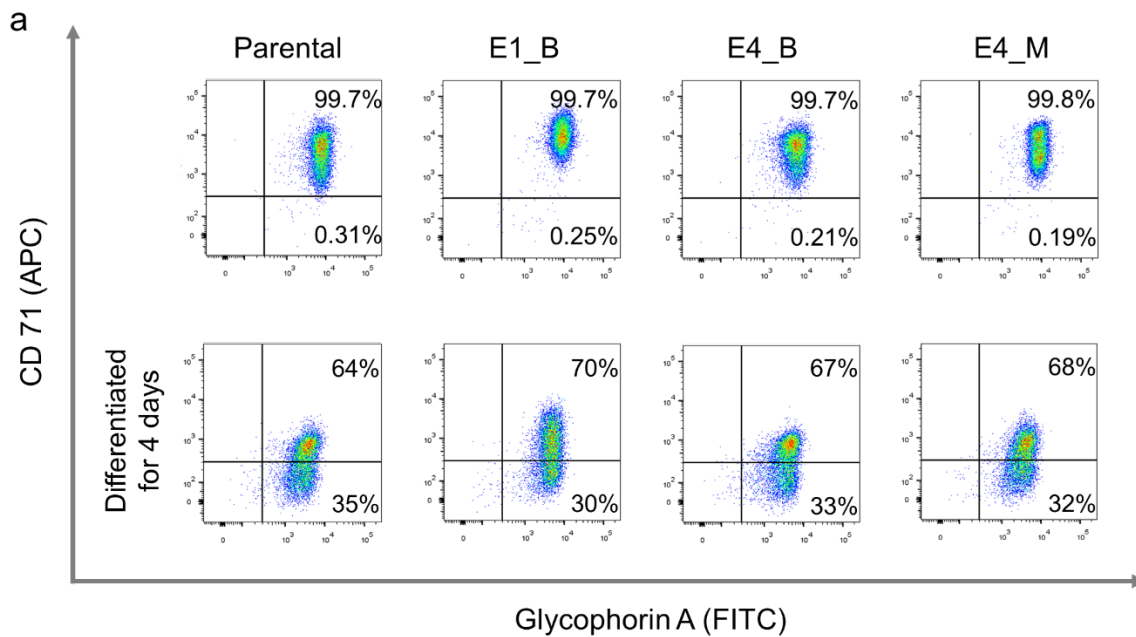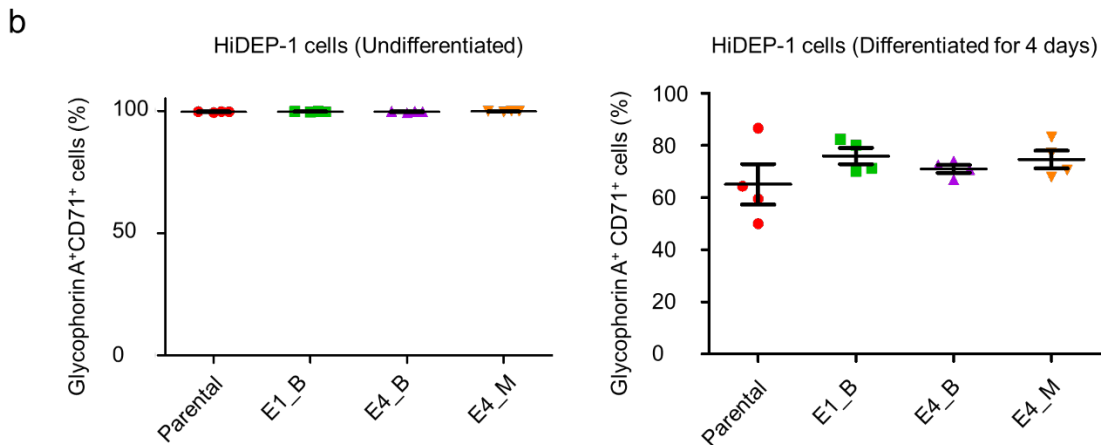

Supplementary Figure 11. Uncropped images of gels shown in Fig. 1b (a) and 1c (b).

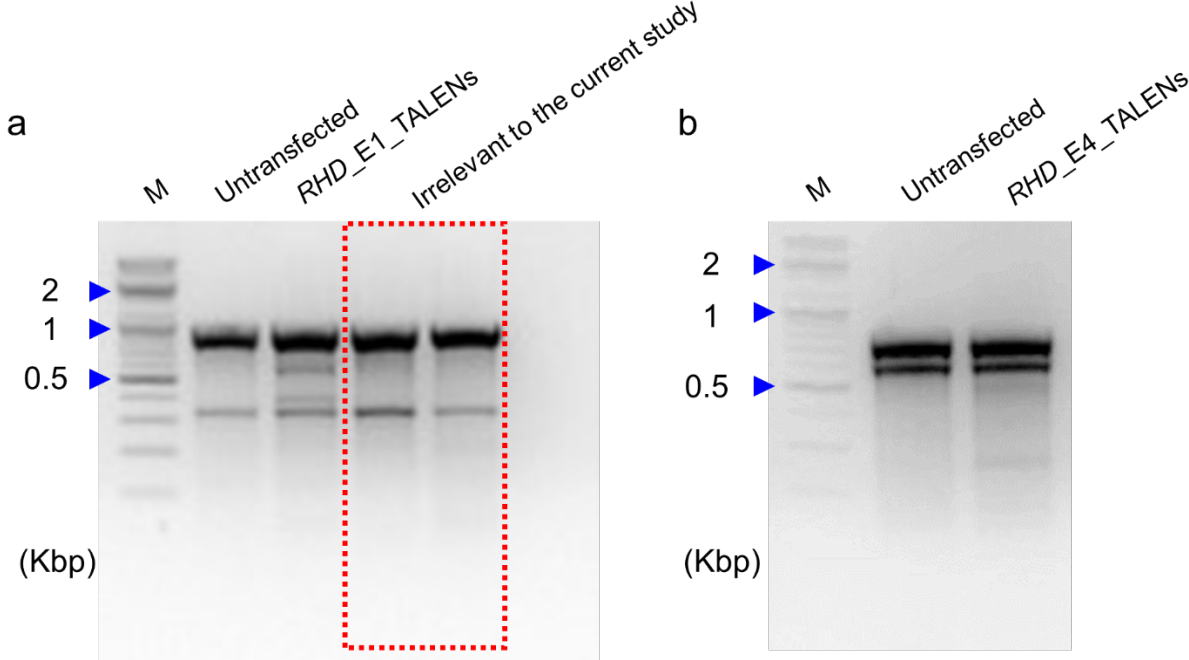

Supplementary Figure 12. Uncropped images of gels shown in Fig. 2b.

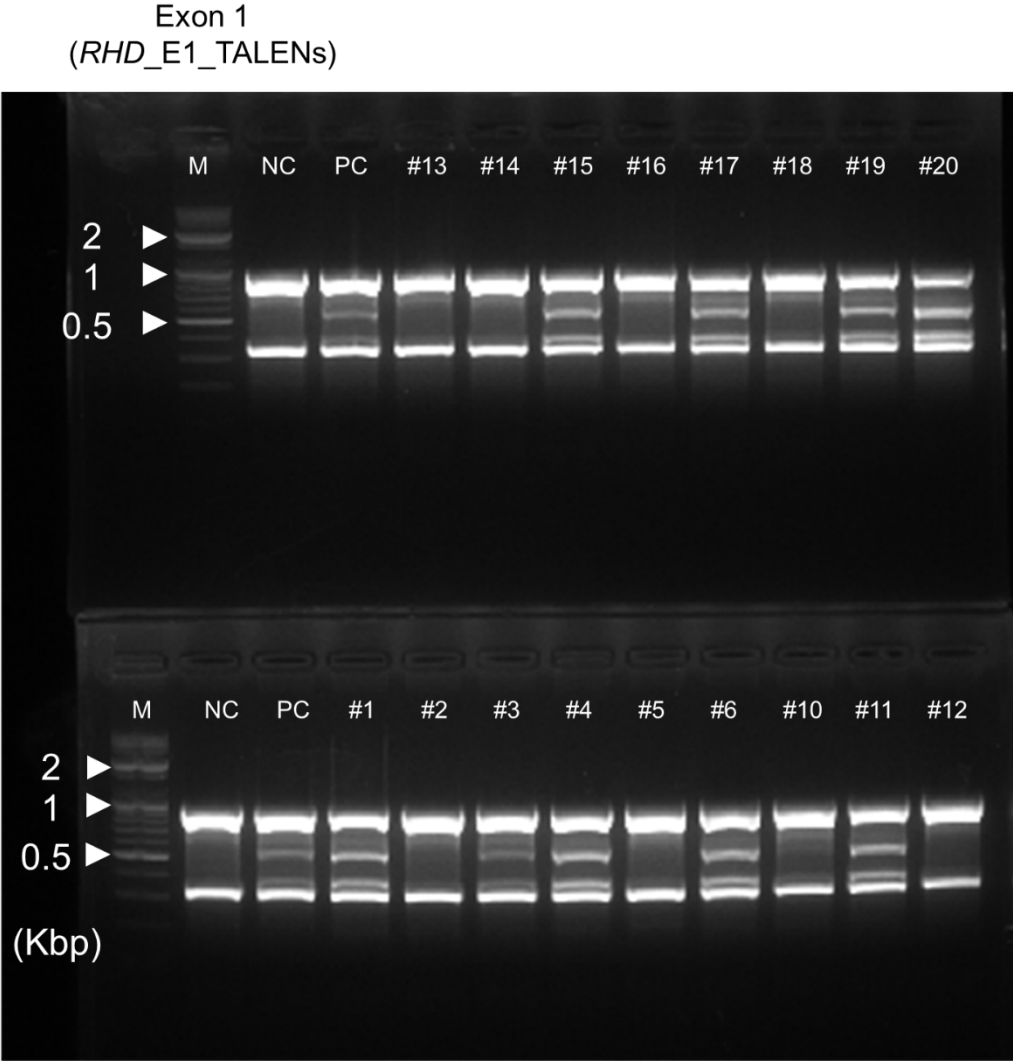

Exon 4  
(RHD\_E4\_TALENs)

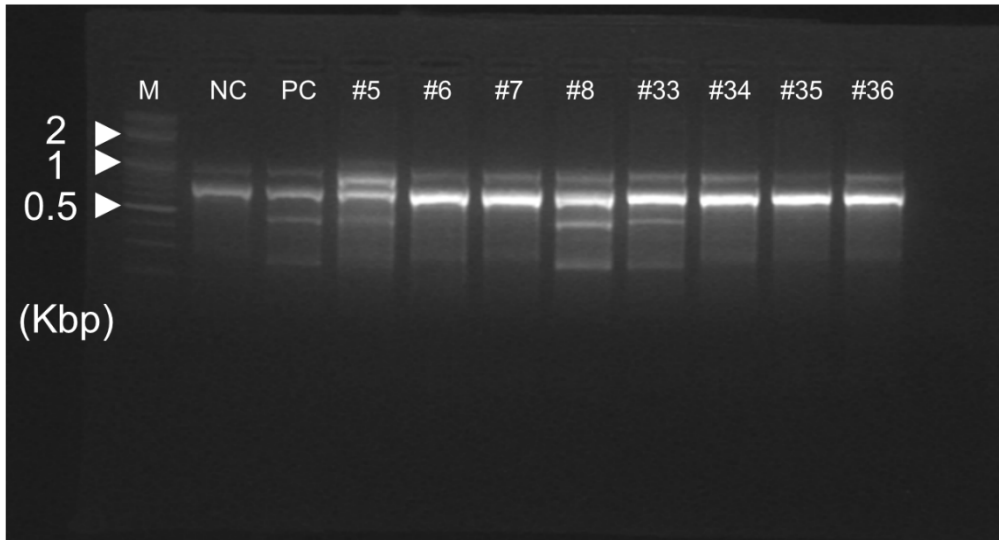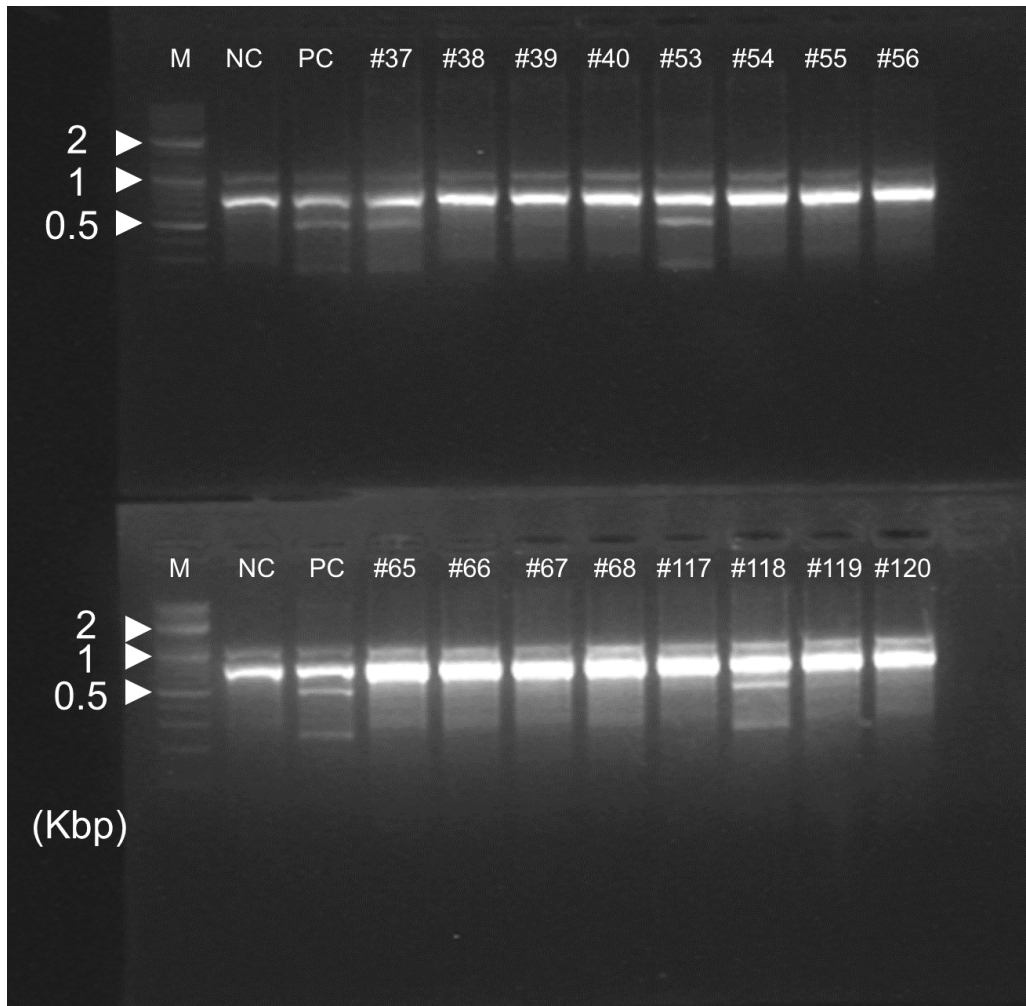

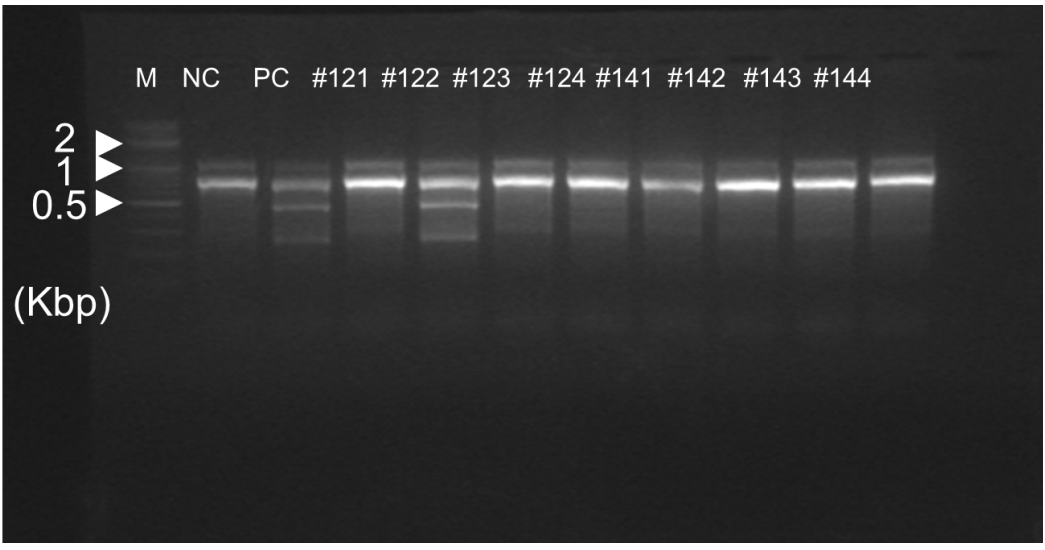

Supplementary Figure 13. Uncropped images of gels shown in Supplementary Fig 3.

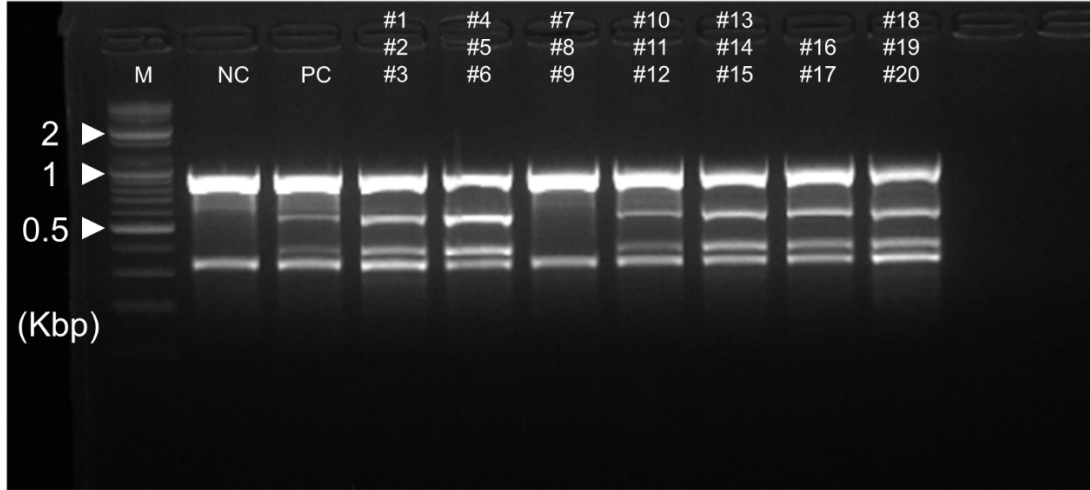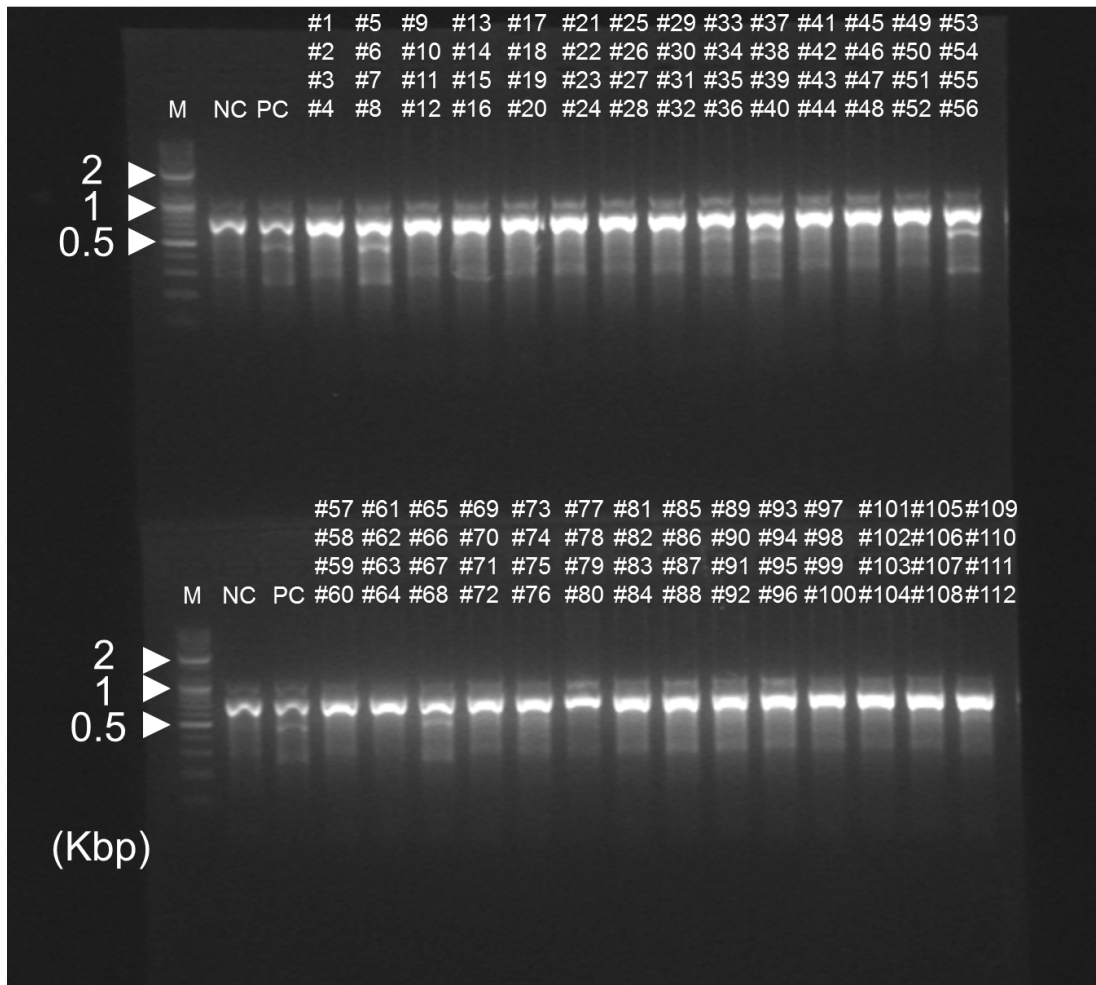

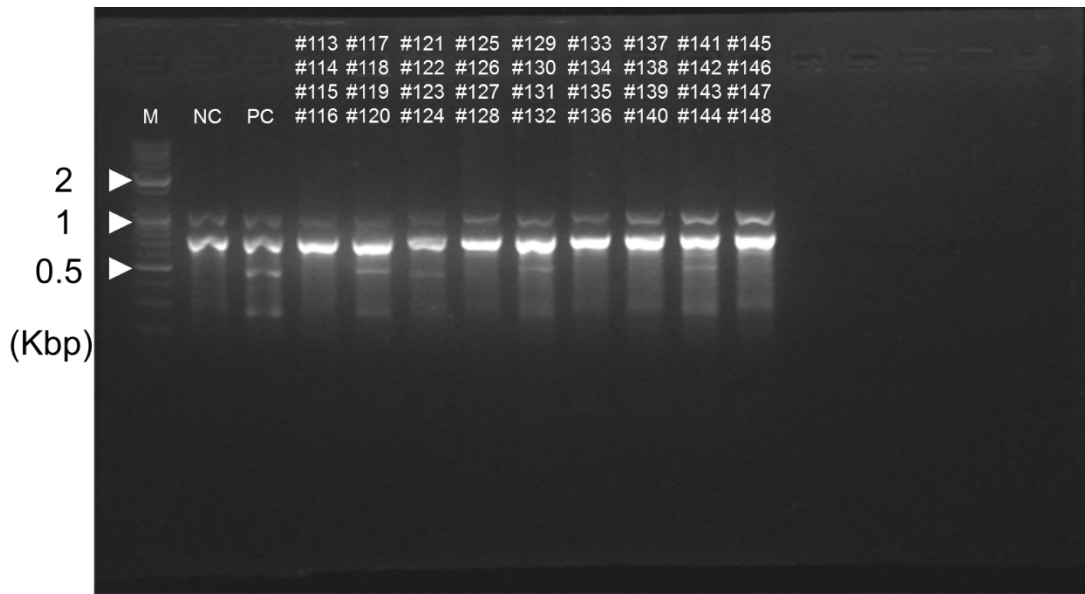



Supplementary Figure 14. Uncropped images of gels shown in Supplementary Fig. 6a (a) and 6c (b).

a

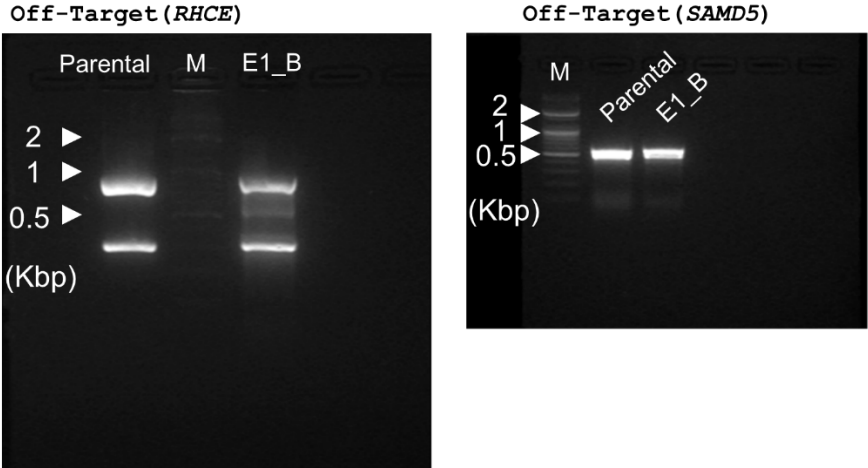

b

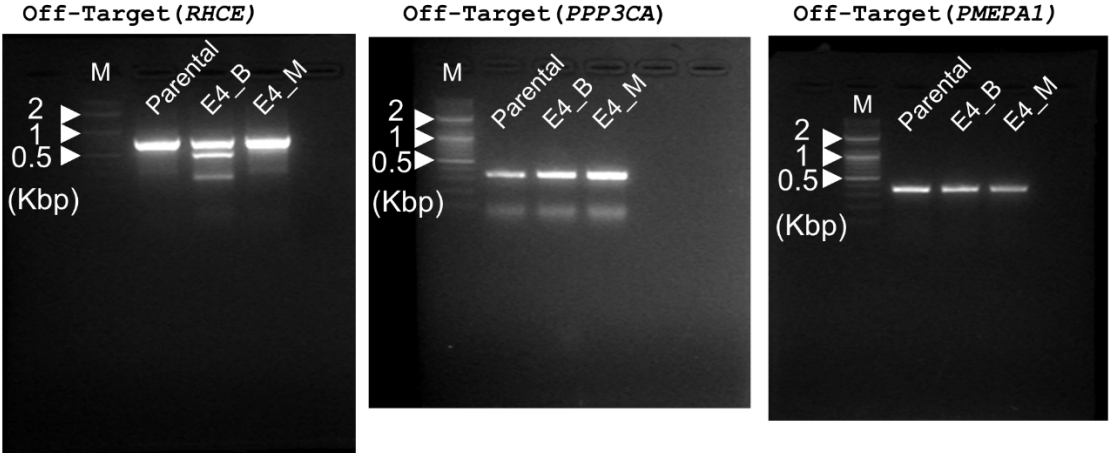

Supplementary Figure 15. Uncropped images of gels shown in Fig. 4a.

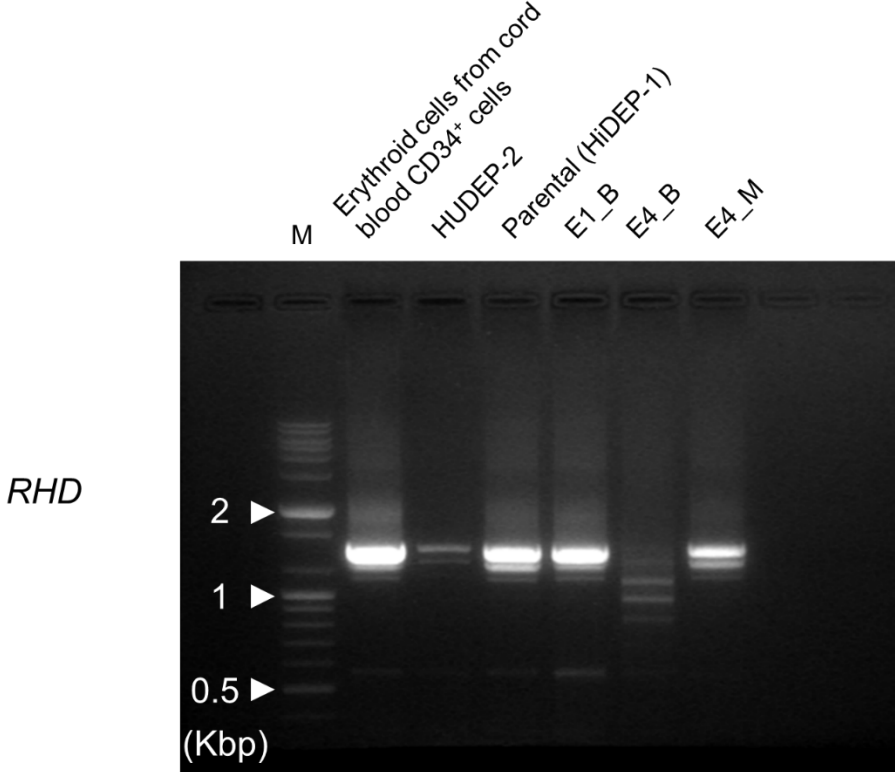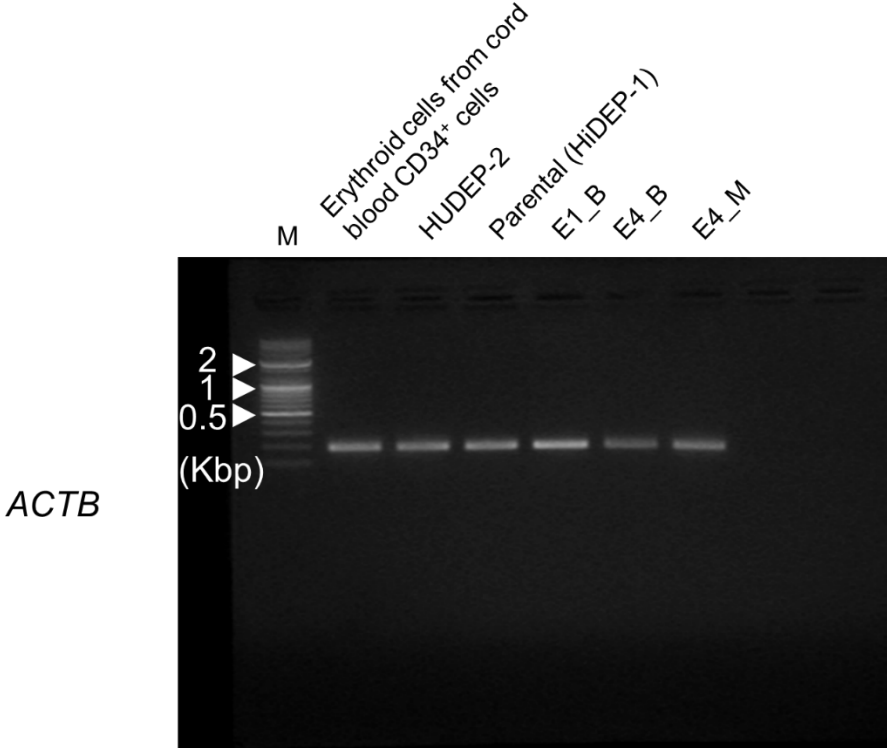

**Supplementary Table 1. The sequences of primers used in this study.**

| primer                                     | sequence (5'-3')                  |
|--------------------------------------------|-----------------------------------|
| <i>RHD</i> _exon1_1st_forward              | ATG GGA GCA CAG GGG AAG TT        |
| <i>RHD</i> _exon1_1st_reverse              | AAA AAT TAG CCA GGC ATG GT        |
| <i>RHD</i> _exon1_2nd_forward              | TTA AGA GCT CAC TGG GTG CC        |
| <i>RHD</i> _exon1_2nd_reverse              | GGG GAA GCA GAG AAG CAG AG        |
| <i>RHD</i> _exon4_1st_forward              | GGT CAA AAG CAT ATA AGA GCT ACT G |
| <i>RHD</i> _exon4_1st_reverse              | ACT CCC CGT TAA GCA CTT TAC AT    |
| <i>RHD</i> _exon4_2nd_forward              | GCA GTG GCT CAT GCC TGT AAT       |
| <i>RHD</i> _exon4_2nd_reverse              | CCT GCT CTG TGA AGT GCT TAA TTC   |
| sequencing_T7 primer                       | TAA TAC GAC TCA CTA TAG GG        |
| RT-PCR_ <i>RHD</i> _forward                | ACA CAG GAT GAG CTC TAA GT        |
| RT-PCR_ <i>RHD</i> _reverse                | GTG GCA GAG AAA GGA TTC AAC TCC   |
| off-target_ <i>RHCE</i> _exon1_1st_forward | GGA TGG GAG CAC AGT TCC GG        |
| off-target_ <i>RHCE</i> _exon1_1st_reverse | AAT TTA GCC AGG CAT GGT GGT G     |
| off-target_ <i>RHCE</i> _exon1_2nd_forward | TTA AGA GCT CAC TGG GTG CC        |
| off-target_ <i>RHCE</i> _exon1_2nd_reverse | GGG GAA GCA GAG AAG CAG AG        |
| off-target_ <i>RHCE</i> _exon4_1st_forward | CTT TCT CCA GTA GCC CAC TAA A     |
| off-target_ <i>RHCE</i> _exon4_1st_reverse | TCA CTT GTC CGT TTC CCT CC        |
| off-target_ <i>RHCE</i> _exon4_2nd_forward | CAC AGT GGC TCA TGC CTG TA        |
| off-target_ <i>RHCE</i> _exon4_2nd_reverse | GGT CCC TAA AAG GAA GTG CTT       |
| off-target_ <i>SAMD5</i> _forward          | CAA TGA GTT CCA GGC TAC CAG AAG   |
| off-target_ <i>SAMD5</i> _reverse          | GCC ATT TAT TGA GGT TTT CCC CCC   |
| off-target_ <i>PMEPA1</i> _forward         | GGG CTT TTT CTC TGA TGA GTG CTG   |
| off-target_ <i>PMEPA1</i> _reverse         | AAA AGA ACA CTC CAA GTA CCC CCG   |
| off-target_ <i>PPP3CA</i> _forward         | CTT TTG ATA TCC CTG GGG GAT TGG   |
| off-target_ <i>PPP3CA</i> _reverse         | GTG CTT GCA CTC CTA TGA GAG TC    |

Supplementary Note 1. Map and sequences of the TALEN-encoding plasmids used in this study.

*RHD\_Exon1\_TALEN\_L*

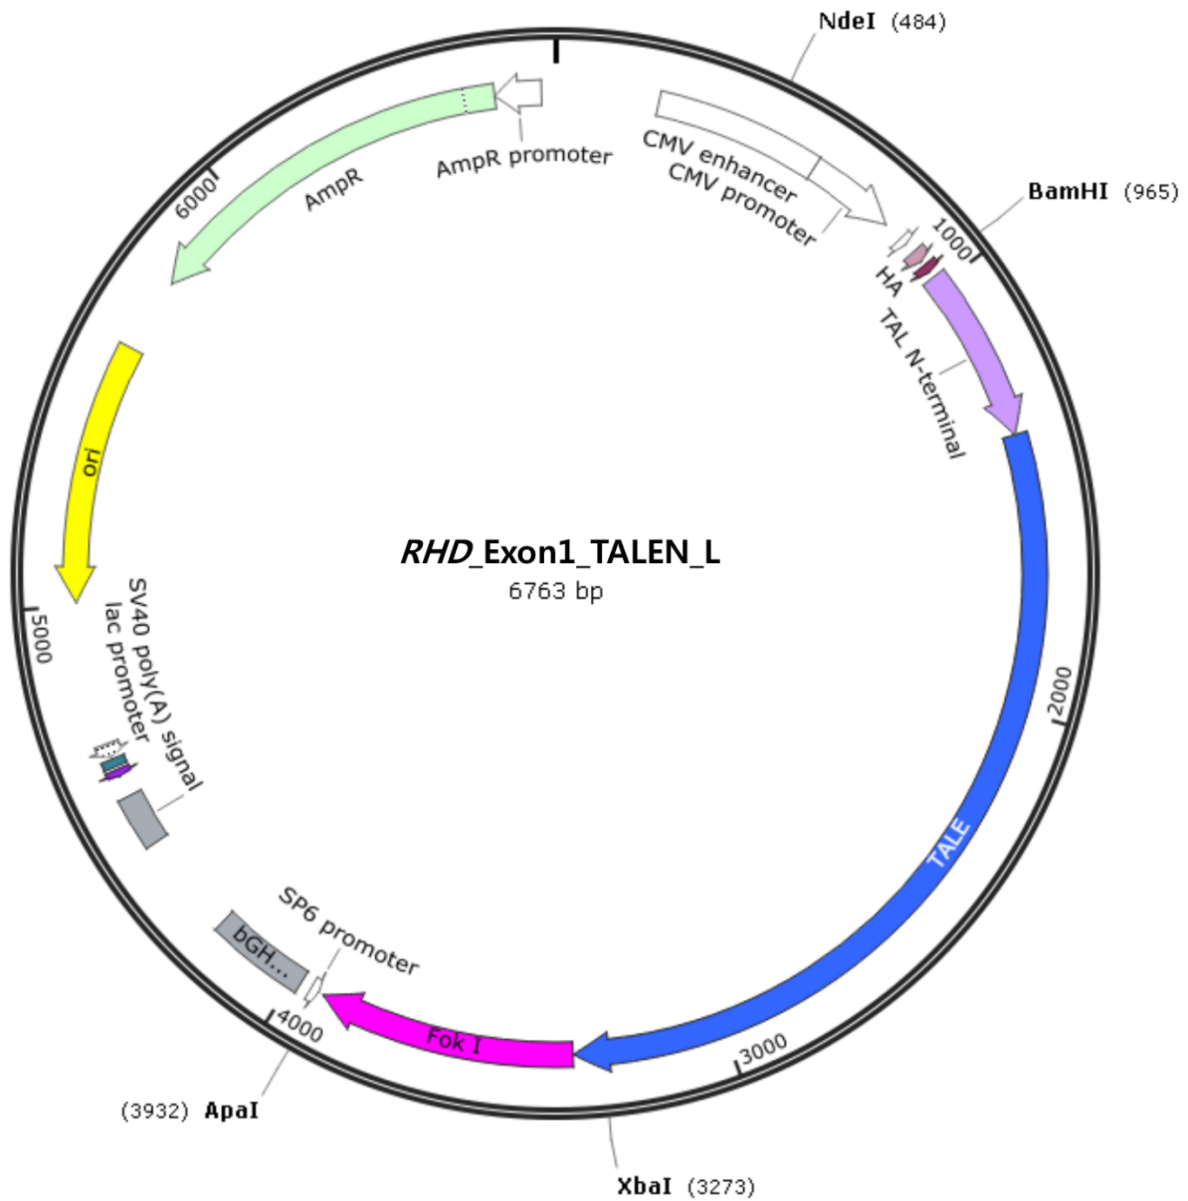

CMV promoter

T7 Promoter

Star codon-HA tag-NLS

TAL N-terminal domain

Target Specific TALE array

Fok I (DAS(Left)/RR(Right) - heterodimer-specific FokI variant)

gacggatcgggagatctcccgatcccctatggctcgactctcagtacaatctgctctgatgccgcatagttaagccag  
tatctgctccctgcttgtgtgtggaggctcgctgagtagtgccgcgagcaaaatttaagctacaacaaggcaaggctt  
gaccgacaattgcatgaagaatctgcttagggtaggcggtttgcgctgcttcg**cgatgtacgggccagataacgc**  
**gttgacattgattattgactagttattaatagtaatacaattacggggctcattagttcattagccataataggagttc**  
**cgcgttacataaacttacggtaaaatggcccgcctggctgaccgcccacgacccccgccattgacgtcaataatgac**  
**gtatggtcccatagtaacgccaatagggactttccattgacgtcaatgggtggactatttacggtaaacgcccact**  
**tggcagtacatcaagtgtatcatalgccaagtacgccccctattgacgtcaatgacggtaaaatggcccgcctggcat**  
**tatgcccagttacatgaccttatgggactttcctacttggcagttacatctacgtattagttcctcgtattaccatggt**  
**gatgcggttttggcagttacatcaatgggctggatagcgggtttgactcaggggatttccaagtctccacccattg**  
**acgtcaatgggagtttgttttggcaccaaaaatcaacgggactttccaaaatgtcgttaacaactccgccccattgacg**  
**caaatgggctggtaggcgtgtacgggtgggaggtctataataagcagagctctctggctaactagagaaccactgctta**  
**ctggcttatcgaaattaatacgaactcactata**ggggagatgcaagcttgccacc**atgggtgtaccctacgacgtgcc**  
**gactacgccaattgcctccaaaaagaagagaaaggta**gggatccgaattca**gatctacgcacgctcgggtacag**  
**ccagcagcaacaggagaagatcaaacggaaggttcgcttcgacagtgccgcagcaccacgagggcactggtcggccatg**  
**ggtttacacacgcgcacatcgttgcgctcagccaacaccggcagcgttagggaccgctcgtgtcaagtatcaggac**  
**atgatcgcagcgttgcagagggcagacacacgaagcagatcgttggcgtcggcaaacagtggtccggcgcacgcgctct**  
**ggaggccttgcacgggtggcgggagagttgagaggtccaccggttacagttggacacaggccaacttctcaagattg**  
**caaacgctggcggcgtgaccgcagtgaggcagtgcatgcatggcgcaatgcaactgacgggtgccccctga**ACCTC  
ACTCCAGATCAGGTGGTGGCTATCGCTAGTAATATTGGAGGAAAGCAAGCCCTCGAAACCGTTCAACGGCTGTTGCC  
AGTGCTCTGTGTCAGGCCATGGTCTTACCCCGACCAGGTTGTGGCAATTGCTTCCAACATCGGCGGGAAGCAAGCAC  
TCGAGACAGTGCAAAGACTTCTTCCCCTTCTGTCAAGCTCACGGATTGACCCCTGCACAAGTCGTGCCATTGCC  
AGCCATGACGGGGGTAAACAAGCCCTCGAGACTGTCCAACGCTTGTCTCCCTGTGTTGTGCCAGGCACATGGgttgAC  
CCCTGAGCAAGTGGTTGCCATTGCCAGTAATATCGGCGGCAAGCAGGCTTTGGAAACTGTTTCAAGATTGCTGCCCG  
TTCTTTGCCAAGCACATGGCTTGACACCCGATCAAGTTGTTGCTATCGCTAGCCATGATGGAGGGAAACAAGCCCTT  
GAGACTGTGCAACGGCTGCTTCCAGTGTGTGCCAAGCTCATGGACTTACTCCCATCAGGTCGTGGCTATTGCATC  
AAATGGTGGTGGCAAACAAGCACTGGAAACCGTTCAAAGGTTGCTTCTGTTCTGTGTGTCAGGACCACGGATTGACac  
caGCACAGGTTGTGCAATCGCATCCAACAATGGAGGAAAACAAGCACTCGAAACCGTTTCAAGCCTGCTTCTGTGTC  
TTGTGTGTCAGGCACACGGACTGACTCCAGACCAGGTGGTTGCTATCGCCAGCAATAACGGAGGTAAACAAGCCTTGGGA  
GACTGTCCAAAGGTTGTTGCCCGTTCTCTGCCAAGACCATGGTTTACACCAGCTCAAGTGGTTGCCATCGCTTCTA  
ATATCGGGGTAAAGCAGGCACTCGAGACAGTCCAGAGACTCCTGCCTGTTCTCTGCcaagCCCACGGCCTCACACCA  
GCTCAGGTTGTTGCCATCGCTAGCAATATTGGTGGGAAACAGGCTCTTGAACCGTTCAACGCCTCCTTCTGTGCT  
CTGTCAAGACCATGGTCTTACACCCGATCAAGTCGTGGCTATTGCTTCAAACAACGGAGGAAAGCAAGCACTTGAGA  
CTGTCCAAACGCTTCTGCCAGTCTCTGCCAGGATCATGGCCTGACTCCAGAACAAGTTGTGGCAATCGCATCTCAC  
GATGGCGGGAACAGGCATTGGAAACCGTTCAAAGGTTGCTGCCAGTCTTTGTGTCAGGCCACGGCCTgactCCAGC  
TCAGGTTGTTGCCATCGCTAGCAATATTGGTGGGAAACAGGCTCTTGAACCGTTCAACGCCTCCTTCTGTGCTCT  
GTCAAGACCATGGTCTTACACCCGATCAAGTCGTGGCTATTGCTTCAAACAACGGAGGAAAGCAAGCACTTGAGACT  
GTCCAACGCTTCTGCCAGTCTCTGCCAGGATCATGGCCTGACTCCAGAACAAGTTGTGGCAATCGCATCTCACGA  
TGGCGGGAACAGGCATTGGAAACCGTTCAAAGGTTGCTGCCAGTCTTTGTGTCAGGCTcaatGGGCTGACCCCTGAGC  
AGGTTGTGCTATCGCTTCCAATGGCGGTGGCAAACAGGCATTGGAGACAGTCCAAGACTCTTGCCCGTCTTGTGT  
CAGGCACACGGGCTTACACCAGATCAGGTGGTCCCATCGCCAGTCAAGTCAGGCTCAAGTGTGCTCAGGCTCAcggctctgactccggaacag  
GAGGGAAAGCAAGCACTTGAACCTGTTCAACGGCTTCTCCAGTGTGTCAGGCTCAcggctctgactccggaacag  
gtggtggcgattgcaagccatgatggcggcaaacaggctctagagagcattgttgcccagctctccagacctgatcc

**ggcgctagccggttgctagtcaaaagtga**Ctcgaggagaagaaatctgaacttcgtcataaattgaaatagtgc  
ctcatgaatatattgaattaattgaaattgccagaaatcccactcaggatagaattcttgaaatgaaggtaattggaa  
tttttatgaaagtttatggatatagaggtgagcatttgggtggatcaaggaaaccggacggagcaatttatactgt  
cggatctcctattgattacggtgtgatcgtggatactaaagcttatagcggaggttataatctgccaatggccaag  
cagatgccatgcaaagctatgtcgaagaaaatcaaacacgaaacaaacatatcaaccctaataatggtggaaagtc  
tatccatcttctgtaacggaatttaagtttttatttggtagtggtcactttaaggaaactacaaagctcagcttac  
acgattaaatcatatcactaattgtaatggagctgttcttagtgtagaagagcttttaattgggtggagaaatgatta  
aagccggcacattaaccttagaggaagtgagacggaaatttaataacggcgagataaaactttctcgattagtagtca  
gggccctattctatagtgacacctaataatgctagagctcgtgatcagcctcgcactgtgccttctagttgccagccat  
ctgttgtttgccctccccgctgccttcccttgaccctggaaggtgccactcccactgtcctttcctaataaaaatgag  
gaaattgcatcgattgtctgagtaggtgtcattctattctgggggggtgggggtggggcaggacagcaagggggagga  
ttgggaagacaatagcaggcatgctggggatgctgggtgggtctatggcttctgaggcggaaagaaccagctggggct  
ctaggggtatccccacgctgcagtgagcgggactctgggggtcgaatgaccgaccaagcgacgccaacctgcc  
tcacgagatctcgattccaccgccccttctatgaaaggttgggcttcggaatcgttttccgggacgcccggctggat  
gatcctccagcggggatctcatgctggagttcttcgcccaccccaactgtttattgacgcttataatgggtaca  
aataaagcaatagcatcacaatttcacaaataaagcattttttcactgcattctagttgtgggtttgtccaaactc  
atcaatgtatcttatcatgtctgtataaccgtcgacctctagctagagcttggcgtaatcatgggtcatagctgtttcc  
tgtgtgaaattgttatccgctcacaattccacacacatacagagccggaagcataaagtgtaaagcctgggggtcct  
aatgagtgagctaaactcacattaattgctgtgctcactgcccgtttccagtcgggaaacctgtcgtgccagctg  
cattaatgaatcggccaacgcgcggggagaggggtttgctgattgggcgctcttccgcttccctcgtcactgactc  
gctgcgctcgggtcgttcgggtgcggcgagcgggtatcagctcactcaaaggcggtaatacgggttatccacagaatcag  
gggataacgcaggaaagaacatgtgagcaaaaggccagcaaaaggccaggaaccgtaaaaaggccgcgttgctggcg  
ttttccataggtcctcgcctcctgacgagcatcacaataatcgacgctcaagtcaaggtgagggtaaacccgacagg  
actataaagataaccaggcgtttccccctggaagctccctcgtgcgctctcctgttccgacctgcccgttaccggat  
acctgtccgcttctccttccggaagcgtggcgtttctcaatgctcacgctgtagggtatctcagttcgggtgtag  
gtcgttcgctccaagctgggctgtgtgcaacgaaccccccgcttcagcccgaaccgctgcgcttaccggtaactatcg  
tcttgagtcacaaccggtaagacacgacttatcgccactggcagcagccactggtaacaggattagcagagcggaggt  
atgtaggcgggtgctacagagttcttgaagtgggtggcctaactacggctacactagaaggacagatatttgggtatctgc  
gctctgctgaagccagttaccttcggaaaaagagttggtagctcttgatccggcaaaacaaaccaccgctggtagcgg  
tggttttttgtttgcaagcagcagattacgcgcagaaaaaaggatctcaagaagatcctttgatcttttctacgg  
ggtctgacgctcagtggaacgaaaactcacgttaagggattttgggtcatgagattatcaaaaaggatcttcacctag  
atccttttaaatataaaatgaagtttttaaatcaatctaaagtataatgagtaaaacttgggtctgacagttaccaatg  
cttaatcagtgaggcacctatctcagcagatctgtctatttctgcttcatccatagttgctgactccccgctcgtgtaga  
taactacgatacgggagggcttaccatctggccccagtgctgcaatgataccgcgagatccacgctcaccggctcca  
gatttatcagcaataaaccagccagccggaagggccgagcgcagaagtggtcctgcaactttatccgcctccatcca  
gtctattaattgttgcgggaagctagagtaagtagttcgccagttaatagtttgcgcaacggttggttgccattgcta  
caggcatcgtgggtgtcacgctcgtcgtttgggtatggcttcattcagctccgggttcccaacgatcaaggcaggttaca  
tgatccccatgttgtgcaaaaaagcgggttagctccttcgggtcctccgatcgttgtcagaagtaagttggccgcagt  
gttatcactcatgggttatggcagcactgcataattctcttactgtcatgccatccgtaagatgcttttctgtgactg  
gtgagtagtcaaccaagtcattctgagaatagtgtatgcggcgaccgagttgctcttgcccggcgtcaatacgggat  
aataccgcccacatagcagaactttaaaagtgctcatcattggaaaacgcttcttcggggcgaaaactctcaaggat  
cttaccgctgttgagatccagttcagatgtaaccactcgtgcacccaactgatcttcagcatcttttactttcacca  
gctttctgggtgagcaaaaacaggaaggcaaaatgccgcaaaaagggaataagggcgacacggaaatgttgaata  
ctcactcttcttcttttcaatatttgaagcatttatcaggggtatttctcatgagcggatacatatttgaatg  
tatttagaaaaataaacaataggggttccgcgcacatttccccgaaaagtgccacctgacgct

## RHD\_Exon1\_TALEN\_R

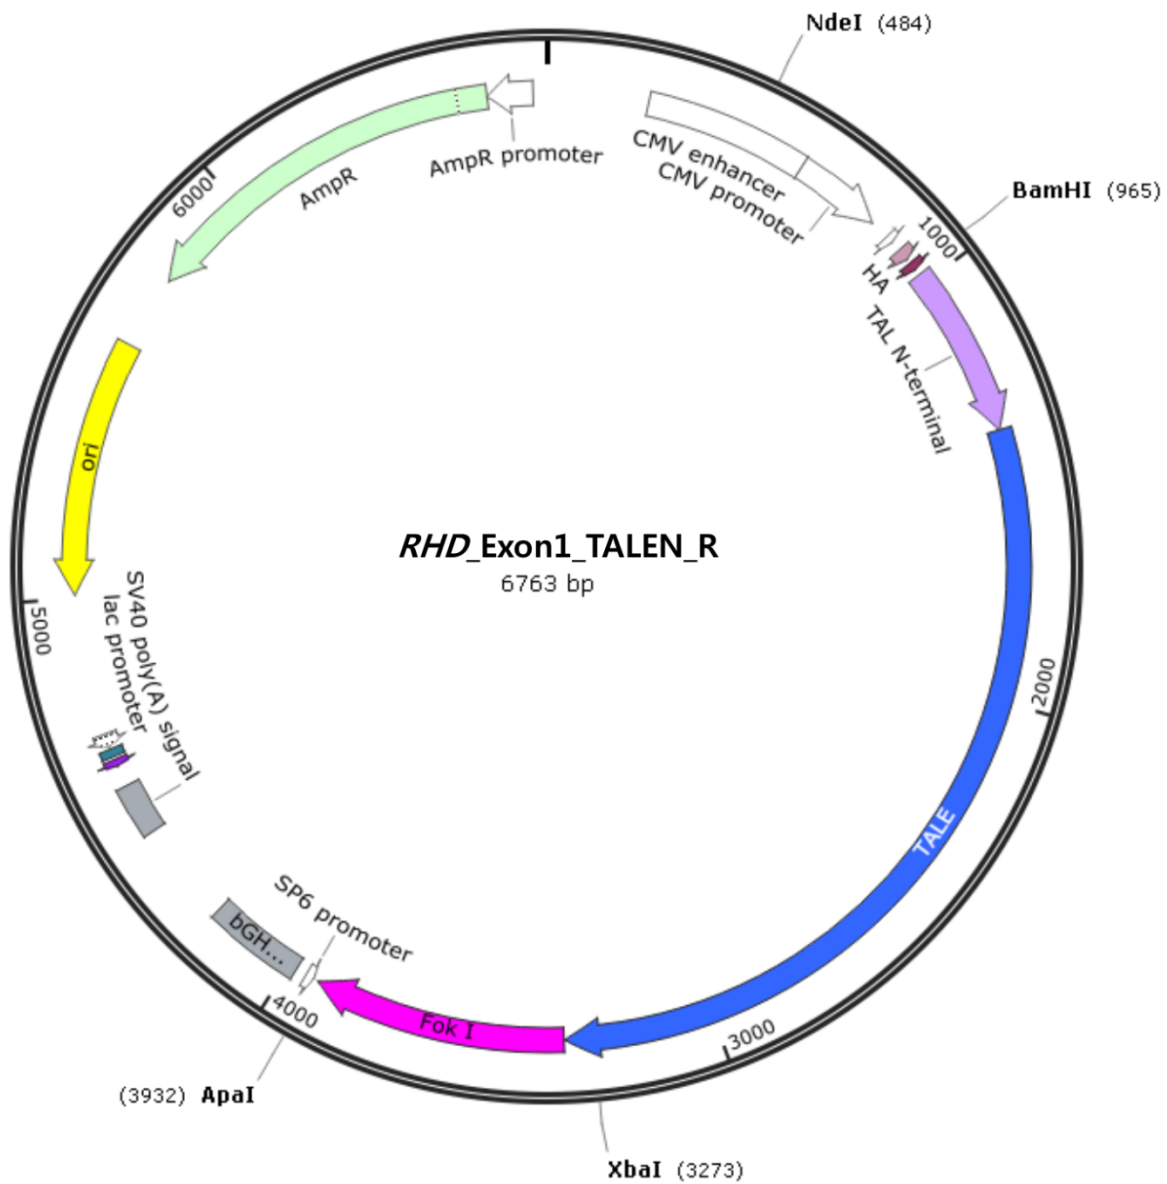

CMV promoter

T7 Promoter

Star codon-HA tag-NLS

TAL N-terminal domain

Target Specific TALE array

Fok I (DAS(Left)/RR(Right) - heterodimer-specific Fok I variant)

```
gacggatcgggagatctcccgatcccctatggctcactctcagtacaatctgctctgatgccgcataagtaagccag
tatctgctccctgcttgtgtgttgaggctcgtgagttagtgccgcagcaaaatttaagctacaacaaggcaaggctt
```

gaccgacaattgcatgaagaatctgcttaggggttaggcggttttgcgctgcttcg**cgatgtacgggcccagataatacgc**  
**gttgacattgattattgactagttattaatagtaatcaattacgggggtcattagttcatagcccataataatggagttc**  
**cgcgttacataaacttacggtaaatggcccgcctggctgaccgcccacgacccccgccattgacgtcaataatgac**  
**gtatgttcccatagtaacgccaatagggactttccattgacgtcaatgggtggactatttacggtaaaactgccact**  
**tggcagtacatcaagtgtatcatatgccaaagtacgccccctattgacgtcaatgacggtaaatggcccgcctggcat**  
**tatgccagtacatgacctatgggactttcctactttggcagtacatctacgtattagtcacgctattaccatgggt**  
**gatgcggtttttggcagtacatcaatgggctggatagcgggtttgactcacggggatttccaagtctccacccattg**  
**acgtcaatgggagttttgttttggcaccaaaatcaacgggactttccaaaatgtcgttaacaactccgccccattgacg**  
**caaatgggcggttaggcgtgtacgggtgggaggtctatataagcagagctctctgggtaactagagaaccactgctta**  
**ctggcttatcgaaattaatac**gactcactata**gggagatgcaagcttgccaccatgggtgtaccctacgacgtgccc**

**gactacgccgaattgctccaaaaaagaagaaaggta**gggagatgcaagcttgccaccatgggtgtaccctacgacgtgccc  
ccagcagcaacaggagaagatcaaacggaaggttcggttcgacagtgggcgcagcaccacgaggcactggtcggccatg  
ggtttacacacgcgcacatcggttgcgctcagccaacaccggcagcgttagggaccgctcgtgtcaagtatcaggac  
atgatcgcagcgttggcagagggcgcacacgaagcgcgcttggcgctggcacaacagtggtccggcgcagcgcctc  
ggaggccttgcacgggtggcgggagagttgagaggtccaccggttacagttggacacaggccaactctcaagattg  
caaacgctggcgcgctgaccgagtgaggcagtgcatgcatggcgcaatgcaactgacgggtgccccctga**ACCTG**  
**ACTCCAGCACAGGTGGTGGCTATTGCCTCCAATAATGGGGGAAAACAGGCTCTCGAAACAGTTCAAAGACTTCTGCC**  
**TGTCCTTGTGCCAAGATCATGGACTTACACCCGCACAAGTCGTTGCAATCGCTAGCAATGGCGGTGGGAAGCAAGCCC**  
**TGGAGACAGTTCAAAGGCTCCTTCCAGTCCTGTGTGAGGCACACGGGCTTACCCCTGATCAAGTGGTCGCAATTGCC**  
**TCACATGACGGCGGGAAAACAGGCATTGGAAACTGTGCAGCGCCTGCTCCCCGTTCTTTGCCAGGATCATGGgttgAC**  
**ACCTGCACAAGTTGTTGCAATTGCAAGCAACGGCGGGGAAAACAGGCACTGGAAACTGTGCAAAGACTCCTGCCAG**  
**TTTTGTGCCAGGCTCATGGCCTGACTCCAGACCAGGTGCTTGGCTATTGCCAGCAATAACGGAGGTAAGCAAGCATTG**  
**GAGACTGTTCCAGCGGCTCCTCCCTGTCTCTGTGAGGCCACGGGCTGACTCCTGCACAGGTGGTGGCCATCGCTTC**  
**AAACGGGGGGGGAAGCAAGCCCTCGAAACTGTTCAACGGTTGTTGCCTGTTTTGTGTGAGGATCATGGGCTTACac**  
**caGAACAAGTCGTGGCAATCGCTTCAAATAATGGCGGAAAGCAAGCTCTCGAAACCGTCCAGAGACTCTTGCCTGTT**  
**CTTTGCCAGGCCACGGGTTGACCCCTGCTCAGGTGGTCGCTATTGCCTCTAACAACGGTGGTAAACAGGCCCTCGA**  
**AACCGTCCAAAGGCTTCTGCCCGTGTCTGTCAAGACCACGGGCTCACACCCGACCAAGTCGTTGCAATCGCTAGTC**  
**ACGACGGAGGGAAGCAGGCATTGGAAACAGTGCAGCGGCTGCTTCCCTGTTTTGTGCcaagCACATGGCCTCACACCT**  
**GCCCAAGTCGTGCAATCGCCTCCCACGACGGCGGCAAGCAGGCATTGGAAACCGTGCAAAGACTTTTGCCAGTGCT**  
**GTGCCAAGCACACGGCCTCACCCCAGCACAAAGTGGTGGCTATCGCTAGCAACGGTGGGGGCAAGCAGGCCCTTGAGA**  
**CAGTTCAGAGGCTCCTTCCCTGTTCTCTGTGAGGATCATGGTTTGACACCAGATCAGGTGGTCGCTATTGCTTCCAAC**  
**AATGGCGGGAAAACAAGCTTTGGAGACTGTGCAACGGTTGCTGCCTGTTCTCTGCCAGGACCACGGGCTgactCCCGA**  
**ACAAGTCGTGCTATTGCAAGCAACAACGGGGGAAAACAGGCCCTGGAGACTGTCCAGCGGCTGTTGCCTGTTCTCT**  
**GTCAGGCACATGGCCTCACCCCTGACCAAGTGGTGGCTATCGCATCTAACGGCGGTGGCAAGCAGGCCTTGGAACA**  
**GTGCAAAGGCTTCTGCCAGTCTTGTGCCAGGATCATGGGCTCACACCAGCTCAGGTTGTTGCAATCGCCAGTAATAA**  
**CGGAGGTAAGCAAGCTCTGGAAACCGTGCAGAGGTTGCTGCCTGTTCTGTGTCAAGTcatGGGCTGACTCCTGACC**  
**AGGTCGTTGCCATTGCTAGTCATGACGGGGTAAACAGGCTCTCGAAACTGTGCAACGCTTGTGGCAGTTTTGTGC**  
**CAAGCTCATGGCTTGACACCTGCACAAGTGGTTGCAATCGCTTACACGACGGAGGAAAGCAAGCCCTCGAAACTGT**  
**GCAGCGGCTCCTCCCCGTGCTGTGTCAAGATCACGGCCTTACACCCGCTCAAGTCGTGCAATTGCCAGCAATGGAG**  
**GCGGTAAGCAGGCCTTGGAGACTGTTTCAAGGTTGTTGCCCGTGCTTTGCCAAGACCAcggctctgactccggaacag**  
**gtggtggcgattgcaagcaataacggcggcaaacaggctctagagagcattggttggccagctctccagacctgatcc**  
**ggcgctagccgcggttgctagtc~~caaaagt~~gaa**Ctcgaggagaagaaatctgaacttcgctcataaattgaaatatgtgc  
ctcatgaatatattgaattaattgaaattgccagaaatcccactcaggatagaattcttgaaatgaaggaatggaa  
tttttatgaaagtttatggatatagaggtgagcatttgggtggatcaaggaaaccggacggagcaatttatactgt  
cggatctcctattgattacgggtgtgatcgtggatactaaagcttatagcggaggttataatctgccaatggccaag  
cagatgccatgcaaagctatgtcgaagaaaatcaaacacgaaacaaacatatcaaccctaatgaatgggtggaaagtc  
tatccatctctgtaaacggaatttaagtttttatttgtgagtggtcactttaaggaaactacaagctcagcttac  
acgattaaatcatatcactaattgtaatggagctgttcttagtgtagaagagcttttaattgggtggagaaatgatta  
aagccggcacattaaccttagaggaagtgagacggaaatttaataacggcagataaaactttctcgattagtagtca  
gggcccctattctatagtgtcacctaaatgctagagctcgtgatcagcctcgaactgtgcttctagttgccagccat  
ctggtgtttgccctccccgctgcttcttgacctggaaggtgccactcccactgctcttcttaataaaatgag  
gaaattgcatcgcattgtctgagtaggtgtcattctattctgggggggtgggggtggggcaggacagcaagggggagga



ttgggaagacaatagcagggcatgctgggggatgcggtgggctctatggcttctgagggcggaaagaaccagctggggct  
ctaggggggtatccccacgctgcagtgagcgggactctgggggtcgaaatgaccgaccaagcgacgccaacctgcca  
tcacgagatctcgattccaccgccccttctatgaaaggttgggcttcggaatcgttttccgggacgcccggctggat  
gatcctccagcgcggggatctcatgctggagttcttcgcccaccccaacttgtttattgcagcttataatggttaca  
aataaagcaatagcatcacaatttcacaaataaagcatttttttactgcattctagttgtggtttgtccaaactc  
atcaatgtatcttatcatgtctgtataaccgtcgacctctagctagagcttggcgtaatcatggctcatagctgtttcc  
tgtgtgaaattgttatccgctcacaattccacacaacatacagagcgggaagcataaagtgtaaagcctgggggtgct  
aatgagtgagctaactcacattaattgcttgcgctcactgcccgtttccagtcgggaaacctgtcgtgccagctg  
cattaatgaatcggccaacgcgcggggagagggcgggtttgctgattggggcgtcttccgcttccctcgtcactgactc  
gctgctcggctcgttcggctgcgggcagcgggtatcagctcactcaaaggcggtaatacggttatccacagaatcag  
gggataacgcaggaaagaacatgtgagcaaaaggccagcaaaaggccaggaaccgtaaaaaggccgcttgcggcg  
ttttccatagggctccgccccctgacgagcatcacaataatcgacgctcaagtcagaggtggcgaaaccgcagcag  
actataaagataaccaggcgtttccccctggaagctccctcgtgctctcctggtccgacctgcccgttaccggat  
acctgtccgcctttctcccttcgggaagcgtggcgctttctcaatgctcacgctgtaggtatctcagttcgggtgtag  
gtcgttcgctccaagctgggctgtgtgcacgaacccccgcttcagcccagccgctgctccttatccggtaactatcg  
tcttgagtcacaaccggtaagacacgacttatcgccactggcagcagccactggtaacaggattagcagagcagaggt  
atgtaggcgggtgctacagagttcttgaagtggtggcctaactacggctacactagaaggacagtatcttggtatctgc  
gctctgctgaagccagttaccttcggaaaaagagttggtagctcttgatccggcaaaacaaaccaccgctggtagcgg  
tggttttttgtttgcaagcagcagattacgctgcagaaaaaaaggatctcaagaagatcctttgatctttctacgg  
ggtctgacgctcagtggaacgaaaactcacgttaagggattttggctcatgagattatcaaaaaggatcttcacctag  
atccttttaaatataaaatgaagttttaaatcaatctaaagtataatagagtaaaacttggctcagcagttaccaatg  
cttaatcagtgaggcacctatctcagcagatctgtctatcttctcgttccatccatagttgcctgactccccgtcgtgtaga  
taactacgatacgggagggcttaccatctggccccagtgctgcaatgataccgcgagatccacgctcaccggctcca  
gatttatcagcaataaaccagccagccggaagggccgagcgcagaaagtggctcctgcaactttatccgcctccatcca  
gtctattaattgttgccgggaagctagagtaagtagttcggccagttaatagtttgcgcaacgttgttgccattgcta  
caggcatcgtgggtgtcacgctcgtcgtttgggtatggcttcattcagctccgggttcccaacgatcaaggcaggttaca  
tgatcccccatgttgtgcaaaaaagcgggttagctccttcgggtcctccgatcgttgtcagaagtaagttggccgcagt  
gttatcactcatggttatggcagcactgcataattctcttactgtcatgccatccgtaagatgcttttctgtgactg  
gtgagtaactcaaccaagtcattctgagaatagtgtagcgggcgaccgagttgctccttgcccggcgtcaatacgggat  
aataccgcgccatagcagaactttaaaagtgtcatcattggaaaacgttcttcggggcgaaaactctcaaggat  
cttaccgctgttgagatccagttcagatgtaaccactcgtgcacccaactgatcttcagcatcttttactttcacca  
gcgtttctgggtgagcaaaaaacaggaaggcaaaatgcccgaaaaaaggggaataagggcgacacggaaatgttgaaata  
ctcatactcttctttttcaatattattgaagcattttatcaggggttattgtctcatgagcggatacatattttgaatg  
tatttagaaaaataaacaataggggttccgcgcacattttccccgaaaagtgccacctgacgct

## RHD\_Exon4\_TALEN\_L

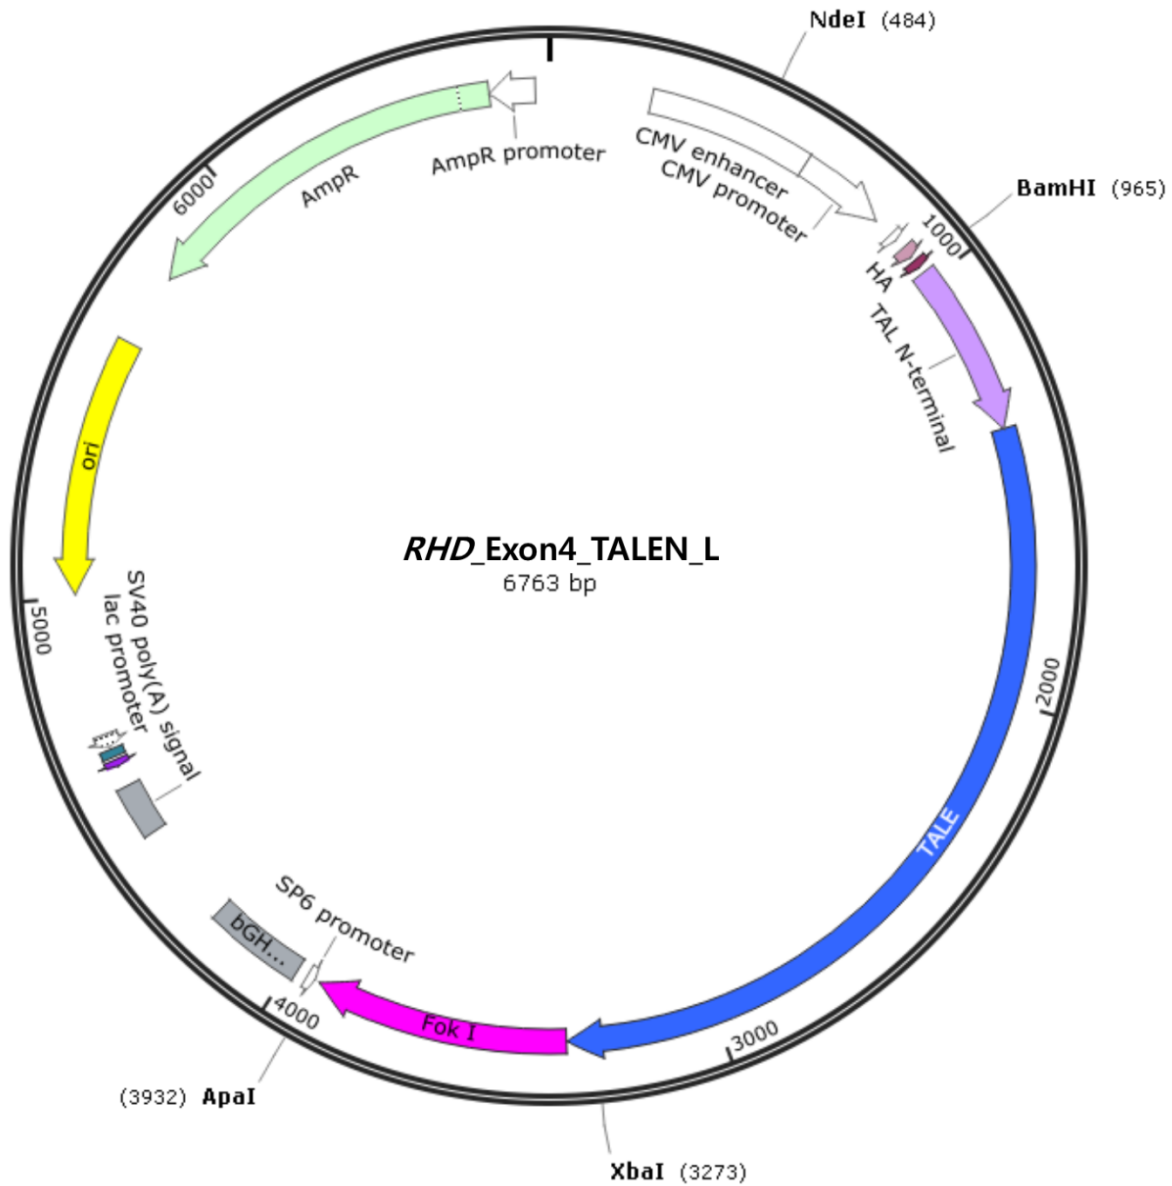

CMV promoter

T7 Promoter

Star codon-HA tag-NLS

TAL N-terminal domain

Target Specific TALE array

Fok I (DAS(Left)/RR(Right) - heterodimer-specific FokI variant)

```
gacggatcgggagatctcccgatcccctatggtcgactctcagtacaatctgctctgatgccgcatagttaagccag
tatctgctccctgcttgtgtgtgttggagggtcgctgagtagtgcgcgagcaaaatttaagctacaacaaggcaaggctt
gaccgacaattgcatgaagaatctgcttaggggttaggcgttttgcgctgcttcgcgatgtacgggcccagatatacgc
gttgacattgattattgactagttattaatagtaatcaattacgggggtcattagttcatagcccatatatggagttc
```

cgcgttacataaacttacggtaaatggcccgcctggctgaccgccaacgacccccgccattgacgtcaataatgac  
gtatgttcccatagtaacgccaatagggactttccattgacgtcaatgggtggactatttacggtaaatgcccact  
tggcagtacatcaagtgtatcatatgccagtagccccctattgacgtcaatgacggtaaatggcccgcctggcat  
tatgccagtagacaccttatgggactttcctacttggcagtagacatctacgtattagtcacgctattaccatggg  
gatgcggttttggcagtagacatcaatgggctggatagcgggtttgactcacggggatttccaagtctccacccattg  
acgtcaatgggagtttgttttggcaccaaaatcaacgggactttccaaaatgtcgttaacaactccgccccattgacg  
caaatgggctggtaggctgtacgggtgggaggtctatataagcagagctctctggctaaactagagaaccactgctta  
ctggcttatcgaaattaatacgaactactatagggagatgcaagcttgccaccatgggtgtaccctacgacgtgcc  
gactacgccgaattgctccaaaaaagaagagaaaggtaggatccgaattcaagatctacgcacgctcggctacag  
ccagcagcaacaggagaagatcaaacggaaggttcgttcgacagtgggcagcaccacgaggcactggctcggccatg  
ggtttacacacgcgcacatcgtttgcgctcagccaacacccggcagcgttagggaccgctcgtctcaagtatcaggac  
atgatcgcagcgttgcagagggcagacacaggaagcgtcgttggcgtcggcaaacagtggtccggcgcacgcgctct  
ggaggccttgcacgggtggcgggagagttgagaggtccaccggttacagttggacacaggccaactctcaagattg  
caaacgctggcggcgtgaccgagtgaggcagtgcatgcatggcgcgaatgactgacgggtgccccctgaACCTG  
ACTCCAGCACAGGTGGTGGCTATTGCCTCCAATAATGGGGGAAAACAGGCTCTCGAAACAGTTCAAAGACTTCTGCC  
TGCTTTGTGCCAAGATCATGGACTTACACCCGCACAAGTCGTTGCAATCGCTAGCAATGGCGGTGGGAAGCAAGCCC  
TGGAGACAGTTCAAAGGCTCCTTCCAGTCCTGTGTGAGGCACACGGGCTTACCCCTGATCAAGTGGTCGAATTGCC  
TCACATGACGGCGGGAAAACAGGCATTGGAACTGTGCAGCGCCTGCTCCCCGTTCTTTGCCAGGATCATGGgttgAC  
ACCTGCACAAGTTGTTGCAATTGCAAGCAACGGCGGGCGAAAACAGGCACTGGAACTGTGCAAAGACTCCTGCCAG  
TTTTGTGCCAGGCTCATGGCCTGACTCCAGACCAGGTGCTTGGCTATTGCCAGCAATAACGGAGGTAAGCAAGCATTG  
GAGACTGTTTCCAGCGGCTCCTCCCTGTCTGTGAGGCCACGGGCTGACTCCTGCACAGGTGGTGGCCATCGCTTC  
AAACGGGGGGGGAAGCAAGCCCTCGAACTGTTCAACGGTTGTTGCCTGTTTTGTGTGAGGATCATGGGCTTACac  
caGAACAAGTCGTGGCAATCGCTTCAAATAATGGCGGAAAGCAAGCTCTCGAAACCGTCCAGAGACTCTTGCCTGTT  
CTTTGCCAGGCCACGGGTTGACCCCTGCTCAGGTGGTGCCTATTGCCTCTAACAACGGTGGTAAACAGGCCCTCGA  
AACCGTCCAAAGGCTTCTGCCCGTGCTCTGTCAAGACCACGGGCTCACACCCGACCAAGTCGTTGCAATCGCTAGTC  
ACGACGGAGGGAAGCAGGCATTGGAAACAGTGCAGCGGCTGCTTCCCTGTTTTGTGCcaagCACATGGCCTCACACCT  
GCCAAAGTCGTGCAATCGCCTCCCACGACGGCGGCAAGCAGGCATTGGAAACCGTGCAAAGACTTTTGCCAGTGCT  
GTGCCAAGCACACGGCCTCACCCACGACAAGTGGTGGCTATCGCTAGCAACGGTGGGGGCAAGCAGGCCCTTGAGA  
CAGTTCAGAGGCTCCTTCCCTGTTCTCTGTGAGGATCATGGTTTGACACCAGATCAGGTGGTGCCTATTGCTTCCAAC  
AATGGCGGGAAAACAAGCTTTGGAGACTGTGCAACGGTTGCTGCCTGTTCTCTGCCAGGACCACGGGCTgactCCCGA  
ACAAGTCGTGCTATTGCAAGCAACAACGGGGGAAAACAGGCCCTGGAGACTGTCCAGCGGCTGTTGCCTGTTCTCT  
GTCAGGCACATGGCCTCACCCCTGACCAAGTGGTGGCTATCGCATCTAACGGCGGTGGCAAGCAGGCCCTGGAAACA  
GTGCAAAGGCTTCTGCCAGTCTTGTGCCAGGATCATGGGCTCACACCAGCTCAGGTTGTTGCAATCGCCAGTAATAA  
CGGAGGTAAGCAAGCTCTGGAAACCGTGCAGAGGTTGCTGCCTGTTCTGTGTCAAGTcatGGGCTGACTCCTGACC  
AGGTCGTTGCCATTGCTAGTCATGACGGGGTAAACAGGCTCTCGAAACTGTGCAACGCTTGTGGCAGTTTTGTGC  
CAAGCTCATGGCTTGACACCTGCACAAGTGGTTGCAATCGCTTACACGACGGAGGAAAGCAAGCCCTCGAAACTGT  
GCAGCGGCTCCTCCCCGTGCTGTGTCAAGATCACGGCCTTACACCCGCTCAAGTCGTGCAATTGCCAGCAATGGAG  
GCGGTAAGCAGGCCCTTGGAGACTGTTTCAAGAGGTTGTTGCCCGTGCTTTGCCAAGACCAcggctctgactccggaacag  
gtggtggcgattgcaagcaataacggcggcaaacaggctctagagagcattggtgccagctctccagacctgatcc  
ggcgctagccgcttgcctagtagcaaaagtgaactcagaggagaagaatctgaacttcgtcataaattgaaatattgtgc  
ctcatgaatataattgaattaattgaaattgccagaaatccactcaggatagaattcttgaaatgaaggtaatggaa  
tttttatgaaagtttatggatatagaggtgagcatttgggtggatcaaggaaaccggacggagcaatttatactgt  
cggatctcctattgattacgggtgtgatcgtggatactaaagcttatagcggaggttataatctgccaatggccaag  
cagatgccatgcaaagctatgtcgaagaaaatcaaacacgaaacaacatatcaaccctaatgaatggtggaaagtc  
tatccatctctgttaacggaatttaagtttttatttgtgagtggtcactttaaggaaactacaagctcagcttac  
acgattaaatcatatcactaattgtaatggagctgttcttagtgtagaagagcttttaattgggtggagaaatgatta  
aagccggcacattaaccttagaggaagtgagacggaaatttaataacggcagataaaactttctcgattagtagtca  
gggcccctattctatagtgtcacctaaatgctagagctcgtgatcagcctcgactgtgccttctagttgccagccat  
ctggttgtttgcccctcccccgctgccttccctgacctggaaggtgccactcccactgtccttcttaataaaatgag  
gaaattgcatcgcattgtctgagtaggtgtcattctattctgggggggtgggggtggggcaggacagcaaggggggagga  
ttgggaagacaatagcaggcatgctggggatgcggtgggctctatggcttctgaggcggaaagaaccagctggggct  
ctaggggggtatccccacgctgcagtgagcgggactctgggggttcgaaatgaccgaccaagcagcagcccaacctgcc

tcacgagatthtcgattccaccgcccgccttctatgaaagggtgggcttcggaatcgthttccgggacgcggctggat  
gatcctccagcgcggggatctcatgctggagttcttcgcccaccccaacttgthttattgcagcttataatggttaca  
aataaagcaatagcatcacaatttcacaaataaagcattthtttactgcattctagttgtggthttgtccaaactc  
atcaatgtatcttatcatgtctgtataaccgtcgacctctagctagagcttggcgtaatcatggctcatagctgtttcc  
tgtgtgaaattgthtatccgctcacaattccacacaacatacgagccggaagcataaagtgtaaagcctggggtgct  
aatgagtgagctaaactcacattaattgcttgcgctcactgcccgcctthccagtcgggaaacctgtcgtgccagctg  
cattaatgaatcggccaacgcgcggggagagggcgtthttgcgtattggcgctctthccgcttctcgtcactgactc  
gctgcgctcggctcgttcggctgcggcgagcggatcagctcactcaaaggcggtaatacggthtatccacagaatcag  
gggataacgcaggaaagaacatgtgagcaaaaggccagcaaaaggccaggaaccgtaaaaaaggccgcgttgctggcg  
thtttccataggctccgccccctgacgagcatcacaataatcgacgctcaagtcagaggtggcgaaaccgcaggg  
actataaagataaccaggcgtthccccctggaagctccctcgtgcgctctcctgthccgacctgcccgttaccggat  
acctgtccgcctthtctccttcgggaagcgtggcgctthtctcaatgctcacgctgtaggtatctcagthcgggtgag  
gtcgttcgctccaagctgggctgtgtgcacgaacccccgthccagcccagcgcgtgcgcttaccggtaactatcg  
tcttgagtcacaaccggtaagacacgacttatcgccactggcagcagccactggtaacaggattagcagagcgaggt  
atgtaggcgggtgctacagagthcttgaagtggtggcctaactacggctacactagaaggacagtatthggatctgc  
gctctgctgaagccagthtaccttcggaaaaagagthggtagctcttgatccggcaaaacaaaccaccgctggtagcgg  
tggththttgttgcaagcagcagattacgcgcagaaaaaaggatctcaagaagatcctthgatctthtctacgg  
ggtctgacgctcagtggaacgaaaactcacgthtaagggtthttggctcatgagattatcaaaaaggatctthccctag  
atcctthtaattaaaaatgaagththtaaatcaatctaaagtataatgagtaaaactthggctgacagthtaccatg  
cttaatcagtgaggcacctatctcagcgatctgtctatthtgcgthcatccatagthtgcctgactccccgtcgtgtaga  
taactacgatacgggagggcttaccatctggccccagtgctgcaatgataccgcgagatccacgctcaccggctcca  
gatttatcagcaataaaccagccagccggaaggccgagcgcagaagtggtcctgcaactthtaccgcctccatcca  
gtctattaattgthtgcgggaagctagagtaagtagthtgcgcaagthtaagthtgcgcaacgthtggthtgcattgcta  
caggcatcgtgggtgctacgctcgtcgtthggatggcttcattcagctccggthtcccaacgatcaaggcaggttaca  
tgatcccccatgthtgtgcaaaaaagcggthtagctccttcggctcctccgatcgtthgtcagaagtaagthtggccgcag  
gthtactcactcatgthtatggcagcactgcataattctcttactgtcatgccatccgtaagatgctthtctgtgactg  
gtgagthtcaaccaagthtctctgagaatagthgtatgcccgcagccagthtgcctcttgcccggcgtcaatacgggat  
aataccgcgcccacatagcagaactthtaaaagthtctcatctthggaaaacgthtcttcggggcgaaaactctcaaggat  
cttaccgctgthtgagatccagthtgcgatgtaaccactcgtgcacccaactgatctthcagcatctthtactthtcca  
gctthtctgggtgagcaaaaaacaggaaggcaaaatgcccgaaaaaagggaataaggggcgacacggaaatgthtgaata  
ctcatactctthtctthtcaatattattgaagcattthtaccgggttattgtctcatgagcggatacatattthgaatg  
tatttagaaaaataaacaataggggtthccgcgcacattthccccgaaaagthtgcacctgacgctc

## RHD\_Exon4\_TALEN\_R

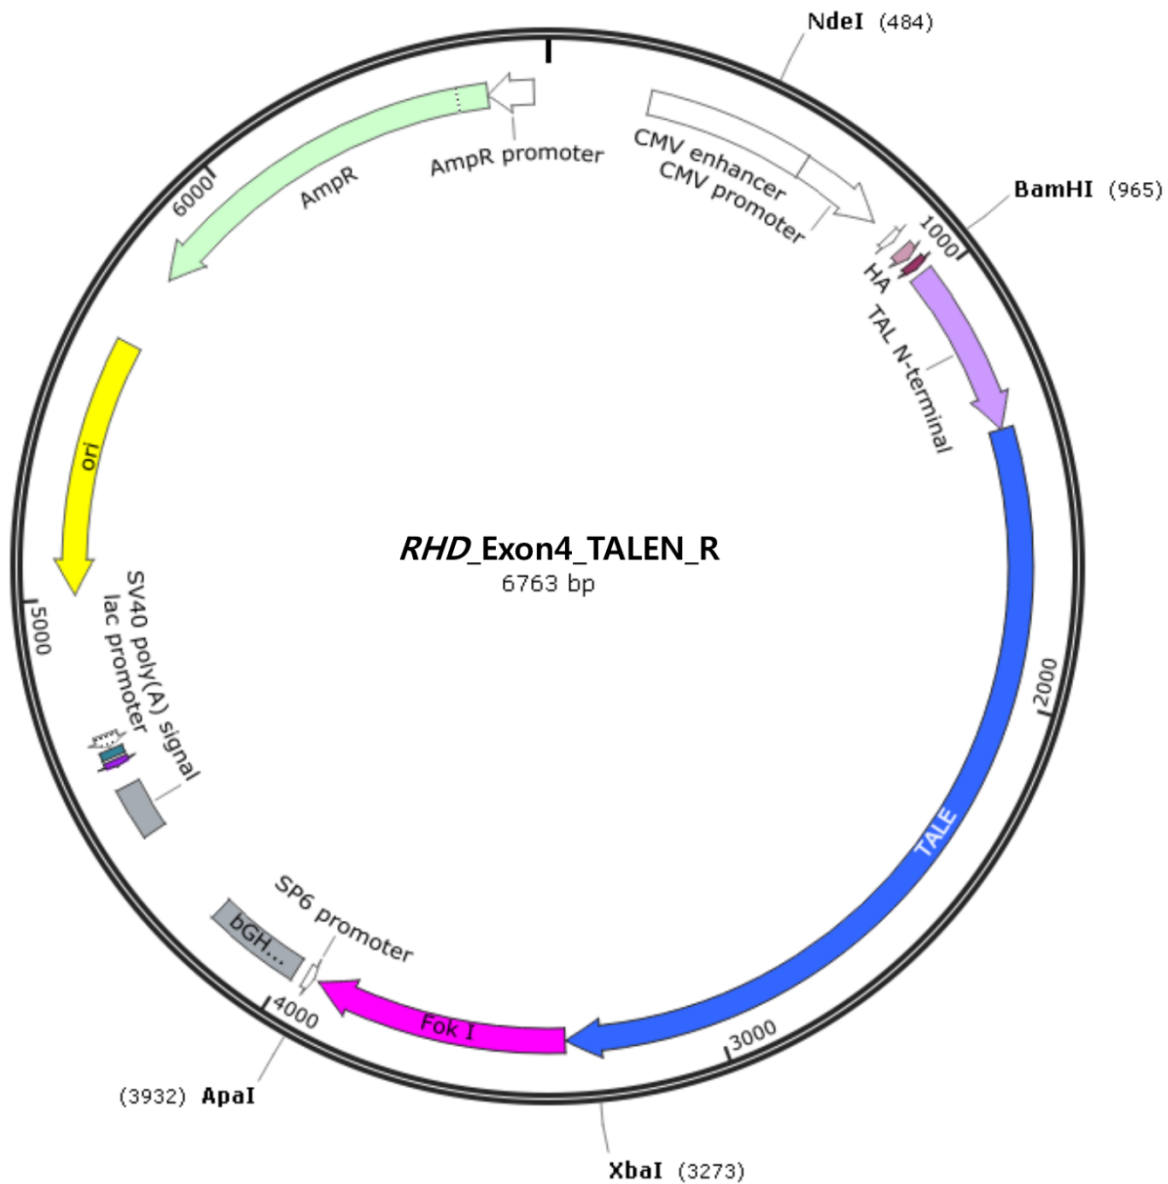

**CMV promoter**

**T7 Promoter**

**Star codon-HA tag-NLS**

**TAL N-terminal domain**

**Target Specific TALE array**

**Fok I (DAS(Left)/RR(Right) - heterodimer-specific FokI variant)**

```
gacggatcgggagatctcccgatcccctatggctgactctcagtacaatctgctctgatgccgcataagtaagccag
tatctgctccctgcttgtgtgttgaggctgctgagtagtgccgcagcaaaatttaagctacaacaaggcaaggctt
```

gaccgacaattgcatgaagaatctgcttaggggttaggcggttttgcgctgcttcg**cgatgtacgggcccagataatacgc**  
**gttgacattgattattgactagttattaatagtaatcaattacgggggtcattagttcatagcccataataggagttc**  
**cgcgttacataaacttacggtaaatggcccgcctggctgaccgcccacgacccccgccattgacgtcaataatgac**  
**gtatgttcccatagtaacgccaatagggactttccattgacgtcaatgggtggactatttacggtaaaactgccact**  
**tggcagtacatcaagtgtatcatatgccaaagtacgccccctattgacgtcaatgacggtaaatggcccgcctggcat**  
**tatgccagtacatgacctatgggactttcctactttggcagtacatctacgtattagtcacgctattaccatgggt**  
**gatgcggtttttggcagtacatcaatgggcgtggatagcgggtttgactcacggggatttccaagtctccacccattg**  
**acgtcaatgggagttttgttttggcaccaaaatcaacgggactttccaaaatgtcgtaaacaactccgccccattgacg**  
**caaatgggcggttaggcgtgtacgggtgggaggtctatataagcagagctctctgggctaactagagaaccactgctta**  
**ctggcttatcgaaattaatac**gactcactata**gggagatgcaagcttgccacc**atgggtgtaccctacgacgtgcc****  
**gactacgccgaattg**cctccaaaaaagaagaaaaggtta**gggatccgaattcaag**atctacgcacgctcggtacag****  
**ccagcagcaacaggagaagatcaaacggaaggttcggttcgacagtgggcgcagcaccacgaggcactggtcggccatg**  
**ggtttacacacgcgcacatcggttgcgctcagccaacaccggcagcgttagggaccgctcgtgtcaagtatcaggac**  
**atgatcgcagcgttggcagagggcgcacacgaagcgcgcttggcgctggcacaacagtggtccggcgcacgcgctct**  
**ggaggccttgcacgggtggcgggagagttgagaggtccaccggttacagttggacacaggccaactctcaagattg**  
**caaacgctggcgcgctgaccgagtgaggcagtgcatgcatggcgcaatgcaactgacgggtgccccctga**ACCTC****  
**ACACCTGACCAGGTCGTGGCCATTGCCAGCAATGGAGGAGGGAAGCAAGCTCTTGAGACTGTGCAGCGCTTGCTTCC**  
**CGTCCTCTGCCAAGCACATGGGCTCACACCCGATCAAGTTGTTGCTATTGCAAGCAATATCGGAGGCAAGCAGGCCT**  
**TGGAAACTGTCCAAAGATTGTTGCCAGTCTTGTGCCAGGATCACGGACTCACCCAGACCAAGTGGTTGCAATTGCT**  
**TCAAATGGCGGGGGCAAACAGGCCCTGGAAACCGTTACGCGGCTTCTTCTGTCTTTTCCAGGCCCATGGgttg**AC****  
**TCCTGACCAGGTCGTTGCCATTGCTAGTCATGACGGGGTAAACAGGCTCTCGAAACTGTGCAACGCTTGTGGCCAG**  
**TTTTGTGCCAAGCTCATGGCTTGACACCTGCACAAGTGGTTGCAATCGCTTACACGACGGAGGAAAGCAAGCCCTC**  
**GAAACTGTGCAGCGCTCCTCCCCGTGCTGTGTCAAGATCACGGCCTTACACCCGCTCAAGTCGTGCAATTGCCAG**  
**CAATGGAGGCGGTAAGCAGGCCTTGGAGACTGTTTCCAGAGGTTGTTGCCCGTGCTTTGCCAAGACCACGGGCTGCac**  
**caGCTCAGGTTGTTGCTATTGCATCTCACGACGGCGGAAAGCAAGCTCTCGAGACAGTCCAGAGGTTGCTTCTGTCT**  
**CTTTGCCAGGACCACGGTCTTACACCTGACCAAGTTGTGCGCCATCGCCTCCCATGATGGTGGGAAACAGGCCCTGGA**  
**AACTGTGCAGCGCTTCTGCCTGTCTCTGTGAGGCCACGGATTGACACCCGAGCAGGTGGTGGCCATTGCTTCTA**  
**ACAACGGGGGCAAGCAGGCCTTGGAGACTGTCCAGAGGCTCCTCCCCGTTCTTTGTcaagCCCATGGCTTGACACCT**  
**GACCAAGTCGTTGCAATCGCTTCAAACGGTGGAGGTAACAAGCTTTGGAAACCGTCCAACGCCTTCTTCCAGTTCT**  
**TTGTGAGGATCATGGTCTTACACCTGAGCAGGTGGTTGCAATTGCCAGCAATGGTGGAGGCAAACAAGCTCTGGAGA**  
**CAGTGCAGAGACTTTTGCCTGTCTTTGCCAGGCCACGGATTGACCCAGACAGGTTGTGCTATTGCATCACAT**  
**GACGGTGGCAAGCAAGCTCTCGAAACTGTCCAGAGATTGCTCCCTGTCTTGTGTCAAGCACATGGTTTTgactCCTGA**  
**CCAGGTCGTTGCCATTGCTAGTCATGACGGGGTAAACAGGCTCTCGAAACTGTGCAACGCTTGTGGCCAGTTTTGT**  
**GCCAAGCTCATGGCTTGACACCTGCACAAGTGGTTGCAATCGCTTACACGACGGAGGAAAGCAAGCCCTCGAAACT**  
**GTGCAGCGGCTCCTCCCCGTGCTGTGTCAAGATCACGGCCTTACACCCGCTCAAGTCGTGCAATTGCCAGCAATGG**  
**AGGCGGTAAGCAGGCCTTGGAGACTGTTTCCAGAGGTTGTTGCCCGTGCTTTGCCAAGAtcatGGCCTGACTCCCGAAC**  
**AGGTGGTGCATATTGCATCACACGACGGAGGGAAGCAGGCCTTGGAAACAGTGCAAAGACTCTTGCCTGTTCTCTGC**  
**CAAGCTCACGGGCTCACTCTGTCAAGTTGTGGCCATCGCTAGCAACAATGGTGGTAAACAGGCATTGGAAACAGT**  
**CCAGAGGCTTCTCCAGTTCTTTGCCAGGATCATGGGTTGACCCCGACCAAGTGGTTGCCATTGCCTCCAATAACG**  
**GGGGAAACAGGCTCTGGAAACCGTTACGCGCCTTCTCCCTGTGTTGTGTCAAGATCAcggctctgactccggaacag**  
**gtggtggcgattgcaagcaataacggcggcaaacaggctctagagagcattggttggccagctctccagacctgatcc**  
**ggcgctagccgcttgctagtc**aaaagtga**Ctcgaggagaagaaatctgaacttcgctcataaattgaaatatgtgc**  
**ctcatgaatatattgaattaattgaaattgccagaaatcccactcaggatagaattcttgaaatgaaggaatggaa**  
**tttttatgaaagtttatggatatagaggtgagcatttgggtggatcaaggaaaccggacggagcaatttatactgt**  
**cggatctcctattgattacgggtgtgatcgtggatactaaagcttatagcggaggttataatctgccaatggccaag**  
**cagatgccatgcaaagctatgtcgaagaaaatcaaacacgaaacaaacatatcaaccctaatgaatgggtggaaagtc**  
**tatccatctctgtaacggaatttaagtttttatttgtgagtggtcactttaaggaaactacaagctcagcttac**  
**acgattaaatcatatcactaattgtaatggagctgttcttagtgtagaagagcttttaattgggtggagaaatgatta**  
**aagccggcacattaaccttagaggaagtgagacggaaatttaataacggcgcagataaaactttctcgattagtagtca**  
**gggcccctattctatagtgtcacctaaatgctagagctcgtgatcagcctcgactgtgcttctagttgccagccat**  
**ctggtgtttgccctccccgctgcttcttgacctggaaggtgccactcccactgtccttcttaataaaatgag**  
**gaaattgcatcgcatgtctgagtaggtgtcattctattctgggggggtgggggtggggcaggacagcaagggggagga**

ttgggaagacaatagcagggcatgctgggggatgcggtgggctctatggcttctgagggcggaaagaaccagctggggct  
ctaggggggtatccccacgctgcagtgagcgggactctgggggttcgaaatgaccgaccaagcgacgcccacctgcca  
tcacgagatctcgattccaccgccccttctatgaaaggttgggcttcggaatcgttttccgggacgcccggctggat  
gatcctccagcgcggggatctcatgctggagttcttcgcccaccccaacttgtttattgcagcttataatggttaca  
aataaagcaatagcatcacaatttcacaaataaagcatttttttactgcattctagttgtggtttgtccaaactc  
atcaatgtatcttatcatgtctgtataaccgtcgacctctagctagagcttggcgtaatcatggctcatagctgtttcc  
tgtgtgaaattgttatccgctcacaattccacacaacatacagagcgggaagcataaagtgtaaagcctgggggtgct  
aatgagtgagctaactcacattaattgcttgcgctcactgcccgtttccagctcgggaaacctgtcgtgccagctg  
cattaatgaatcggccaacgcgcccgggagagggcgggtttgctgattggggcgtcttccgcttccctcgtcactgactc  
gctgcgctcggctcgttcggctgcggcgagcggatcagctcactcaaaggcggtaatacggttatccacagaatcag  
gggataacgcaggaaagaacatgtgagcaaaaggccagcaaaaggccaggaaccgtaaaaaggccgcttgcggcg  
ttttccatagggctccgccccctgacgagcatcacaataatcgacgctcaagtcagaggtggcgaaccgacagg  
actataaagataaccaggcgtttccccctggaagctccctcgtgcgctctcctgttccgacctgcccgttaccggat  
acctgtccgcctttctcccttcgggaagcgtggcgctttctcaatgctcacgctgtaggtatctcagttcgggtgtag  
gtcgttcgctccaagctgggctgtgtgcacgaacccccgcttcagcccagccgctgcgccttatccggtaactatcg  
tcttgagtcacaaccggtaagacacgacttatcgccactggcagcagccactggtaacaggattagcagagcggagt  
atgtaggcgggtgctacagagttcttgaagtgggtggcctaactacggctacactagaaggacagtatcttggtatctgc  
gctctgctgaagccagttaccttcggaaaaagagttggtagctcttgatccggcaaaacaaaccaccgctggtagcgg  
tggttttttgtttgcaagcagcagattacgcgcagaaaaaaaggatctcaagaagatcctttgatctttctacgg  
ggtctgacgctcagtggaacgaaaactcacgttaagggattttggctcatgagattatcaaaaaggatcttcacctag  
atccttttaaatataaaatgaagtttttaaatcaatctaaagtataatagagtaaaacttggctcagcagttaccaatg  
cttaatcagtgaggcacctatctcagcagatctgtctatcttctcgttcacatagttgcctgactccccgtcgtgtaga  
taactacgatacgggagggcttaccatctggccccagtgctgcaatgataccgcgagatccacgctcaccggctcca  
gatttatcagcaataaaccagccagccggaagggccgagcgcagaagtggctcctgcaactttatccgcctccatcca  
gtctattaattgttgccgggaagctagagtaagttagttcgccagttaatagtttgccgcaacgttgttgccattgcta  
caggcatcgtgggtgtcacgctcgtcgtttgggtatggcttcattcagctccgggttcccaacgatcaaggcaggttaca  
tgatcccccatgttgtgcaaaaaagcgggttagctccttcgggtcctccgatcgttgtcagaagtaagtggccgcagct  
gttatcactcatggttatggcagcactgcataattctcttactgtcatgccatccgtaagatgcttttctgtgactg  
gtgagtaactcaaccaagtcattctgagaatagtgtatgcgggcagccgagttgctccttgcccggcgtcaatacgggat  
aataccgcgccacatagcagaactttaaaagtgtcatcattggaaaacgttcttcggggcgaaaactctcaaggat  
cttaccgctggttgagatccagttcagatgtaaccactcgtgcacccaactgatcttcagcatcttttactttcacca  
gcgtttctgggtgagcaaaaaacaggaaggcaaaatgcccgaaaaaaggggaataagggcgacacggaaatgttgaaata  
ctcatactcttctttttcaatattattgaagcatttatcaggggttattgtctcatgagcggatacatatttgaatg  
tatttagaaaaataaacaataggggttccgcgcacatttccccgaaaagtgccacctgacgct

## Supplementary Reference

47. Flegel, W.A. et al. In-frame triplet deletions in RHD alter the D antigen phenotype. *Transfusion* **46**, 2156–2161 (2006).
